# Supplementary material for: Implementation of RCIP scheme and its performance for 1D age computations in ice-sheet models
Source: Copernicus journal article supplement (doi:10.5194/gmd-2020-53), 2020-03-04
Supplement: Supplementary file [file gmd-2020-53-RC2-supplement.pdf]

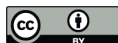

# Implementation of RCIP scheme and its performance for 1D age computations in ice-sheet models

Fuyuki SAITO<sup>1</sup>, Takashi OBASE<sup>2</sup>, and Ayako ABE-OUCHI<sup>2,1</sup>

<sup>1</sup>Japan Agency for Marine-Earth Science and Technology (JAMSTEC), Yokohama, Japan

<sup>2</sup>Atmosphere Ocean Research Institute, Univ. of Tokyo, Kashiwa, Japan

**Correspondence:** SAITO Fuyuki (saitofuyuki@jamstec.go.jp)

**Abstract.** Ice sheet age computations are formulated using an Eulerian advection equation, and there are many schemes that can be used to solve them numerically. Typically, these differ in numerical characteristics such as stability, accuracy, and diffusivity. Furthermore, although various methods have been presented for ice sheet age computations, the constrained interpolation profile method and its variants have not been examined in this context. The present study introduces one of its variants, a rational function-based constrained interpolation profile scheme (RCIP) to one-dimensional ice age computation, and demonstrates its performance levels via comparisons with those obtained from first- and second-order upwind schemes. Our results show that the RCIP scheme preserves the pattern of input surface mass balance histories, in terms of the vertical profile of internal annual layer thickness, better than the other schemes.

## 1 Introduction

10 Core samples extracted from ice sheets can provide an archive of past climate history data, and a major issue for researchers attempting to utilize ice-core properties is defining the age of ice along the depth of the ice sheet. This process is often called *dating*. Dating with numerical ice-flow models is an important approach, because one can estimate age profiles before actual drilling of ice cores. For example, in Fischer et al. (2013), the authors present an application of ice-flow models to evaluate potential ‘Oldest-Ice’ study area. 

15 Various methods for use in ice-sheet model dating, or more generally in tracer transport have been adopted and compared. Mügge et al. (1999) compared particle tracking (Lagrangian) and Eulerian schemes under simulated steady-state three-dimensional (3D) velocity fields of Antarctic ice sheet. That study concluded that the Eulerian scheme works well, except for the bottom part, which encounters problems due to numerical diffusion. In Rybak and Huybrechts (2003), the authors also compared the Lagrangian and Eulerian schemes for simulated Antarctic ice sheets under various schematic steady-state con-

20 ditions and analytical solutions, as well as under different 3D velocity fields. Similarly, they concluded that the Lagrangian method produced less error than an Euler approach, although the difference was small over a large part of the domain. Greve et al. (2002) compared several Eulerian schemes such as central difference schemes, first- and second-order upwind schemes, Quadratic Upstream Interpolation for Convective Kinematics (QUICK), and total variation diminished (TVD) Lax-Wendroff (LW) schemes. From comparisons of the one-dimensional (1D) steady-state age profiles produced by these schemes, they con-

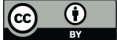

25 cluded that the second-order upwind and TVD-LW schemes performed well for typical ice sheet age profiles. In Tarasov and Peltier (2003), the authors compared various interpolation schemes in order to compute upwind departure points in a semi-Lagrangian tracer model in terms of preservation of input signal phases and amplitudes, while Schmeissner et al. (2005); Clarke et al. (2005) developed a new interpolation method that can be used in a semi-Lagrangian scheme, and discussed computed ice-core age-depth relationships for the Greenland Ice Core Project (GRIP) ice-core.

30 To date, various methods have been presented and demonstrated for use in ice-sheet age computations. However, there are still a variety of numerical schemes that have not been examined within this context. These include the constrained interpolation profile (CIP) method (e.g., Yabe et al., 2001) and its variants. Accordingly, the present study introduces a CIP method variant named the rational function-based constrained interpolation profile (RCIP) method (Xiao et al., 1996) for use in 1D ice age computations and demonstrates the performance of the scheme.

### 35 1.1 Brief introduction of RCIP scheme

This section describes a standard algorithm of the CIP scheme family that is used to solve a 1D advection equation with a non-advection term as follows:

$$\frac{\partial f}{\partial t} + u(x,t) \frac{\partial f}{\partial x} = h(x,t), \quad (1)$$

40 where  $f = f(x,t)$  is a free variable to solve,  $u = u(x,t)$  is a velocity field,  $h = h(x,t)$  is an arbitrarily (non-advection) field, and  $t$  and  $x$  are temporal and spatial coordinates, respectively. In CIP schemes, Eq. (1) is solved by performing time-splitting algorithm (e.g., Yabe and Takei, 1988) into two phases as follows:

$$\frac{\partial f}{\partial t} + u(x,t) \frac{\partial f}{\partial x} = 0, \quad \text{the advection phase} \quad (2)$$

$$\frac{\partial f}{\partial t} = h(x,t). \quad \text{the non-advection phase} \quad (3)$$

Appendix A presents a note on time-splitting technique.

45 The primary characteristic of this CIP scheme is introduction of an additional equation to solve the spatial derivatives of  $f$  at the same time. Differentiation of Eq. (1) provides the equation for  $g(x,t) = \frac{\partial f}{\partial x}$ :

$$\frac{\partial g}{\partial t} + u(x,t) \frac{\partial g}{\partial x} = \hat{h}(x,t) = \frac{\partial h}{\partial x} - g \frac{\partial u}{\partial x}. \quad (4)$$

Equation (4) is an advection formula that is similar to Eq. (1) with non-advection function  $\hat{h}(x,t)$  in the right-hand side, which is solved using a time-splitting procedure similar to those used in Eqs. (2) and (3):

50  $\frac{\partial g}{\partial t} + u(x,t) \frac{\partial g}{\partial x} = 0,$  advection phase (5)

$$\frac{\partial g}{\partial t} = \hat{h}(x,t). \quad \text{non-advection phase} \quad (6)$$

The algorithm used to solve the advection phases (Eqs. 2 and 5), which is a core characteristic of the CIP scheme family, is described here, followed by that used to solve the non-advection phases (Eqs. 3 and 6).

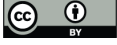

In semi-Lagrangian approaches, a particle at  $(x, t + \Delta t)$  originates from the position of the upstream departure point  $x_{\text{dep}}$   
 55 such that

$$f(x, t + \Delta t) = f(x_{\text{dep}}, t), \quad (7)$$

where

$$x_{\text{dep}} = x + \int_{t+\Delta t}^t dt u(x, t). \quad (8)$$

The CIP method constructs an interpolation function  $F_j(x)$  for the  $f(x)$  between two adjacent grid-points  $x_j$  and its upwind  
 60 point  $x_{j+1}$  when  $u_j < 0$  in order to assess the value at the departure point. Introducing  $\langle \xi \rangle = x_{\text{dep}} - x_j$ , as the distance to the  
 original point, allows the time evolution of  $f(x_j)$  and  $g(x_j)$  to be solved as simple advection equations:

$$\begin{cases} f(x_j, t + \Delta t) = f(x_j + \langle \xi \rangle, t) = F_j(x_j + \langle \xi \rangle), \\ g(x_j, t + \Delta t) = g(x_j + \langle \xi \rangle, t) = G_j(x_j + \langle \xi \rangle), \end{cases} \quad (9)$$

where  $G_j(x) = \frac{\partial F_j}{\partial x}$ . Computation of the distance to the departure point will be described in Sect. 1.2. The piecewise interpo-  
 lation function  $F_j(x)$  for  $x_j \leq x \leq x_{j+1}$  is defined to be constrained by the continuity condition at  $x_j$  and  $x_{j+1}$  as

$$65 \begin{cases} F_j(x_j) = f(x_j), & F_j(x_{j+1}) = f(x_{j+1}), \\ G_j(x_j) = g(x_j), & G_j(x_{j+1}) = g(x_{j+1}). \end{cases} \quad (10)$$

A cubic polynomial is chosen in the original CIP scheme, as

$$F_j(X) = C_0 + C_1 X + C_2 X^2 + C_3 X^3, \quad (11)$$

where  $X = x - x_j$ . The four coefficients  $C_0, C_1, C_2$ , and  $C_3$  in Eq. (11) are determined to satisfy the constraints (Eq. 10). The  
 RCIP scheme framework is occasionally extended to introduce a rational function (Xiao et al., 1996) such as

$$70 F_j(X) = \frac{C_0 + C_1 X + C_2 X^2}{1 + D_1 X}. \quad (12)$$

The interpolation function is switched from the cubic (11) to the rational (12) if  $g_j \leq S_j \leq g_{j+1}$  or if  $g_j \geq S_j \geq g_{j+1}$ , where

$$S_j = \frac{f_{j+1} - f_j}{\Delta x_{j+\frac{1}{2}}}, \quad \Delta x_{j+\frac{1}{2}} = x_{j+1} - x_j. \quad (13)$$

Additionally, the four coefficients  $C_0, C_1, C_2$ , and  $D_1$  are determined in order to satisfy the same constraints. The two inter-  
 polation functions Eqs. (11) and (12) are integrated by introducing a switching parameter  $\alpha$ :

$$75 F_j(X) = \frac{C_0 + C_1 X + C_2 X^2 + C_3 X^3}{1 + \alpha D_1 X}. \quad (14)$$

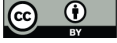

The five coefficients used to satisfy the constraints are computed as

$$D_1 = \frac{1}{\Delta x_{j+\frac{1}{2}}} \left[ \left| \frac{S_j - g_j}{g_{j+1} - S_j} \right| - 1 \right], \quad (15)$$

$$C_3 = \frac{g_j - S_j + (g_{j+1} - S_j)(1 + \alpha D_1 \Delta x_{j+\frac{1}{2}})}{\Delta x_{j+\frac{1}{2}}^2}, \quad (16)$$

$$C_2 = S_j \alpha D_1 + \frac{S_j - g_j}{\Delta x_{j+\frac{1}{2}}} - C_3 \Delta x_{j+\frac{1}{2}}, \quad (17)$$

$$80 \quad C_1 = g_j + f_j \alpha D_1, \quad (18)$$

$$C_0 = f_j. \quad (19)$$

The switching parameter  $\alpha \in [0, 1]$  is chosen as 1 when it is necessary to use rational interpolation. In other cases, 0 is selected. If  $\{f_j\}$  and  $\{g_j\}$  at time  $t$  are known, the new states  $\{f_j^*\}$  and  $\{g_j^*\}$  are predicted by shifting by distance along the characteristics (Eq. 9) to the departure point  $\langle \xi \rangle$ , as follows:

$$85 \quad \begin{cases} f_j^* = F_j(\langle \xi \rangle) = \frac{C_0 + C_1 \langle \xi \rangle + C_2 \langle \xi \rangle^2 + C_3 \langle \xi \rangle^3}{1 + \alpha D_1 \langle \xi \rangle}, \\ g_j^* = G_j(\langle \xi \rangle) = \frac{C_1 + 2C_2 \langle \xi \rangle + 3C_3 \langle \xi \rangle^2}{1 + \alpha D_1 \langle \xi \rangle} - \frac{\alpha D_1}{1 + \alpha D_1 \langle \xi \rangle} f_j^*. \end{cases} \quad (20)$$

The solutions above are those of the advection phases (Eqs. 2 and 5). The time evolutions of  $f$  and  $g$  in the non-advection phases are again calculated according to Eqs. (3) and (6), typically by using a forwarding scheme, starting from the solution of the advection phase  $\{f_j^*\}$  and  $\{g_j^*\}$ , as an intermediate solution:

$$\begin{cases} \frac{f_j(t + \Delta t) - f_j^*}{\Delta t} = h_j \\ \frac{g_j(t + \Delta t) - g_j^*}{\Delta t} = \hat{h}_j. \end{cases} \quad (21)$$

90 As discussed in Xiao et al. (1996), the formulation of the RCIP scheme possesses attractive properties, such as convexity and monotone preservation, as well as phase speed.

## 1.2 Upstream departure point

Equation (8) gives the distance to the departure point:

$$\langle \xi \rangle = - \int_t^{t+\Delta t} dt u(x, t). \quad (22)$$

95 A simple and primitive way to integrate Eq. (22) is to use the local velocity even if the velocity is a function of time and space (e.g., Toda et al., 2009), such that

$$\langle \xi \rangle = -u_j \Delta t. \quad (23)$$



Another way is to apply the ‘mid-point rule’, where both spatial and temporal mean velocity between the target and departure points replaces  $u_j$  in Eq. (23), which is generally computed in an iterative fashion (Tarasov and Peltier, 2003). In the present  
 100 paper, a third approach is adopted. First, a steady and linear velocity field between the target and departure points,  $x_j$  and  $x_{\text{dep}}$ , is assumed such that

$$u(x) = u(x_j) + (x - x_j)u', \quad (24)$$

where  $u'$  is a constant spatial gradient of the velocity. In order to solve the time evolution of the velocity of a particle at  $(t_m, x_j)$ , Eq. (24) is differentiated by time  $t$ :

$$105 \quad \frac{du}{dt} = \frac{dx}{dt}u' = u'u, \quad (25)$$

which is solved as

$$u(t) = u(t_m) \exp[u'(t - t_m)]. \quad (26)$$

Introducing Eq. (26), Eq. (22) is integrated as

$$\langle \xi \rangle = - \int_{t_m}^{t_m + \Delta t} dt u(t) = -u(t_m) \Delta t \left[ \frac{\exp(u' \Delta t) - 1}{u' \Delta t} \right], \quad (\text{when } u' \neq 0) \quad (27)$$

$$110 \quad \langle \xi \rangle = -u(t_m) \Delta t, \quad (\text{when } u' = 0). \quad (28)$$

Based on the above, it can be interpreted that the distance to the departure point is that of constant velocity case (Eq. 23 or 28), multiplied by the bracket term in Eq. (27) as a correction factor. Here, it should be noted that the correction factor reaches 1 toward the limit of  $u' \rightarrow 0$ , which definitely corresponds to the constant velocity case. The velocity gradient  $u'$  already appears in the advection equation of the  $g$  term (Eq. 4), which is reused in the departure point computation.

## 115 2 Model description

### 2.1 Governing equation

The computation used to determine the age of the ice, i.e., the elapsed time since the ice deposit, is performed with the pure advection equation<sup>1</sup>:

$$\frac{d\mathcal{A}}{dt} = 1, \quad (29)$$

120 where  $\mathcal{A}$  is the age and  $t$  is time, which is the Lagrangian approach. Eq. (29) is then reformulated into the Eulerian equation for a 1D problem,

$$\frac{\partial \mathcal{A}}{\partial t} + w(z, t) \frac{\partial \mathcal{A}}{\partial z} = 1, \quad (30)$$

<sup>1</sup>Some models adopt 0 for the right-hand side (e.g., Rybak and Huybrechts, 2003) simply because they use a different age definition. For such cases, redefining  $\mathcal{A}$  as  $\mathcal{A} - t$  results in an equation that is identical to Eq. (29).



where  $\mathcal{A} = \mathcal{A}(z, t)$  and  $w = w(z, t)$  are the age and vertical velocity fields, respectively, and  $z$  is the vertical coordinate. Some models introduce an artificial diffusion term in order to achieve stable integration (e.g., Mège et al., 1999). However, the pure advection form is kept throughout the present paper. Following most of large-scale numerical ice-sheet models (Greve and Hutter, 1995), the vertical coordinate  $z$  is scaled with the local thickness. Introducing the scaled coordinate  $\zeta$  as

$$\zeta = \frac{z - b}{H}, \quad (31)$$

Eq. (30) is reformulated as follows:

$$\frac{\partial \mathcal{A}}{\partial \tau} + \omega \frac{\partial \mathcal{A}}{\partial \zeta} = 1, \quad (32)$$

where  $\tau \equiv t$  is the corresponding time coordinate in this system,  $b = b(t)$  is the bedrock topography, and  $H = H(t)$  is the ice thickness. The new velocity term  $\omega = \omega(\zeta, \tau)$  in  $\tau, \zeta$ -system is computed as

$$\omega = w \frac{\partial \zeta}{\partial z} + \frac{\partial \zeta}{\partial t}, \quad (33)$$

where derivatives of  $\zeta$  are computed as:

$$\frac{\partial \zeta}{\partial z} = \frac{1}{H}, \quad (34)$$

$$\frac{\partial \zeta}{\partial t} = -\frac{1}{H} \left[ \frac{\partial b}{\partial t} + \zeta \frac{\partial H}{\partial t} \right]. \quad (35)$$

Since ice thickness  $H$ , which actually reflects the changes in the boundary conditions, may not be constant throughout the time period,  $H = H(t)$  is prescribed independently of the boundary conditions in this paper. The surface mass balance term  $M_s$  (mass input into the domain), surface evolution, and the vertical velocity at the surface  $z = h(t)$  are related as

$$w(z = h(t)) = \frac{\partial h}{\partial t} + M_s(t), \quad (36)$$

which is derived from the kinematic boundary conditions based on the assumption of a flat surface. The spatial derivative of  $\mathcal{A}$  used in the RCIP scheme is derived as follows:

$$\frac{\partial \mathcal{A}'}{\partial \tau} + \omega \frac{\partial \mathcal{A}'}{\partial \zeta} = -\frac{\partial \omega}{\partial \zeta} \mathcal{A}', \quad (37)$$

where  $\mathcal{A}' = \frac{\partial \mathcal{A}}{\partial \zeta}$ .

In order to solve the time evolution of age and its gradient (Eqs. 32 and 37), the initial and boundary conditions are required. At the free surface  $z = h(t)$  (or  $\zeta = 1$ ), a Dirichlet-type boundary condition,

$$\mathcal{A}(\zeta = 1) = 0, \quad (38)$$

holds when the surface mass balance is positive (i.e.,  $M_s > 0$ ). In contrast, when the surface balance is negative, the boundary condition is not necessary, because the departure point of the free surface is inside the ice. A special treatment is required



for the zero mass balance at the surface,  $M_s = 0$ . In this case, the velocity term in  $\tau, \zeta$ -system,  $\omega$  becomes 0, so Eq. (38) is  
 150 simplified as

$$\frac{\partial \mathcal{A}}{\partial \tau} = 1, \quad (39)$$

which, again, requires no boundary condition for age. The boundary conditions at the bottom  $\zeta = 0$  simply mirror those at the surface.

The age derivative,  $\mathcal{A}'$ , also satisfies the boundary condition at the free surface as

$$155 \quad \mathcal{A}'(\zeta = 1) = -\frac{1}{M_s}, \quad (40)$$

when  $M_s > 0$ . Conditions similar to age hold for the age derivative when  $M_s < 0$  and  $M_s = 0$ .

In the present study, equivalent but different representation of coefficients (Eqs. 15–19) are adopted on the RCIP method implementation, which is described in Appendix B.

## 2.2 Discretization

160 The spatial discretization of Eqs. (32) and (37) can be either uniform or non-uniform. In the present paper, both types of discretization are examined. Since uniform discretization is a special case of non-uniform discretization, the latter can be described effectively without a loss of generality.

One way to introduce a non-uniform discretization is to apply a *non-smooth* grid (Shashkov, 1995), which prescribes irregular discretization of the coordinates:

$$165 \quad 0 \equiv \zeta_0 < \zeta_1 < \dots < \zeta_{N_k-1} \equiv 1, \quad (41)$$

and

$$\Delta \zeta_{k+1/2} = \zeta_{k+1} - \zeta_k \quad \text{for } k = 0, \dots, N_k - 2 \quad (42)$$

170 Another way to introduce a non-uniform discretization is to apply a *smooth* grid (Shashkov, 1995), which uses a smooth function to transform the coordinate system. One more coordinate transformation is then performed for a non-uniform smooth-grid system as follows:

$$\frac{\partial \mathcal{A}}{\partial T} + W \frac{\partial \mathcal{A}}{\partial Z} = 1, \quad (43)$$

$$\frac{\partial \mathcal{A}'}{\partial T} + W \frac{\partial \mathcal{A}'}{\partial Z} = -\frac{\partial W}{\partial Z} \mathcal{A}', \quad (44)$$

where  $T$  and  $Z$  are the time and vertical coordinates in the new system. A smooth transformation of  $Z = Z(\zeta)$  or its inverse  $\zeta = \zeta(Z)$  is prescribed where necessary. Similarly, a new velocity term  $W = W(Z, T)$  in  $T, Z$ -system is computed as

$$175 \quad W = \omega \frac{\partial Z}{\partial \zeta}. \quad (45)$$



Equations (43) and (44), which are the target equations to solve, are simply replacements for Eqs (32) and (37), respectively. The velocity term  $W = W(T, Z)$  is prescribed (as will be explained later). The terms  $\mathcal{A}$ ,  $W$ , and 1 on the right-hand side correspond to  $f$ ,  $u$ , and  $h$ , respectively, in the RCIP scheme framework (Eq. 1). Although it is possible to introduce further non-uniform discretization on the  $Z$ -coordinate, in the present paper, only a uniform discretization is examined on the smooth-  
 180 grid discretization:

$$Z_k = \frac{k}{N_k - 1}, \quad \text{for } k = 0, \dots, N_k - 1. \quad (46)$$

Actually, the discretization of the  $\zeta$ -coordinate corresponds to the special case of non-uniform smooth discretization with  $Z \equiv \zeta$ . Therefore, for both uniform and non-uniform discretization, the scheme will be described hereafter using the  $Z$ -coordinate instead of the  $\zeta$ -coordinate.

### 185 2.3 Comparing other schemes with RCIP schemes

In the present paper, two numerical schemes, the first- and second-order upwind schemes, are examined in comparison with the RCIP schemes. While there are other numerical schemes suitable for such comparisons, including other semi-Lagrangian or even higher-order upwind schemes, these have already been reported in past studies (Mügge et al., 1999; Greve et al., 2002; ak and Huybrechts, 2003; Tarasov and Peltier, 2003; Clarke et al., 2005). Furthermore, since our study focuses on  
 190 a demonstration of RCIP schemes in relation to the topic of ice dating, a wide range of comparisons is beyond the scope this paper.

The ‘first-order’ upwind scheme in the present paper evaluates the advection term using the velocity at staggered grid points as follows:

$$W \frac{\partial \mathcal{A}}{\partial Z} \Big|_{Z=Z_k} \simeq W_{k+1/2} \frac{\mathcal{A}_{k+1} - \mathcal{A}_k}{\Delta Z_{k+1/2}} = W_{k+1/2} \mathcal{A}'_{\text{I}}(Z_{k+1/2}), \quad (47)$$

195 when  $W_{k+1/2} < 0$  and  $W_{k-1/2} < 0$ . The velocity at staggered grid points is computed by linear interpolation of the two adjacent velocities at normal grid points. Equation (47) corresponds to numerical integration with the midpoint rule if a Dirichlet-type boundary condition is applied on the upper surface (38) and the velocity is kept negative throughout. Since, positive vertical velocity is rarely considered for typical ice dating topics, the mid-point rule formulation mentioned above is sufficient for application. On the other hand, a different approach is generally required for a grid point where two velocities at staggered  
 200 adjacent grid points have opposite signs. In this paper, the velocity term is simply replaced by that at the normal grid point:

$$W \frac{\partial \mathcal{A}}{\partial Z} \Big|_{Z=Z_k} \simeq W_k \mathcal{A}'_{\text{I}}(Z_{k+1/2}), \quad (48)$$

where  $W_k < 0$ , and  $W_{k+1/2}$  and  $W_{k-1/2}$  have opposite signs.

For the ‘second-order’ upwind scheme, the derivative of the age term is replaced by the second-order upwind difference formulation as

$$205 \quad W \frac{\partial \mathcal{A}}{\partial Z} \Big|_{Z=Z_k} \simeq W_k \mathcal{A}'_{\text{II}}(Z_k), \quad (49)$$





where

$$A'_{II}(Z_k) = \frac{(2\Delta Z_{k+\frac{1}{2}} + \Delta Z_{k+\frac{3}{2}})A'_I(Z_{k+\frac{1}{2}}) - \Delta Z_{k+\frac{1}{2}}A'_I(Z_{k+\frac{3}{2}})}{\Delta Z_{k+\frac{1}{2}} + \Delta Z_{k+\frac{3}{2}}} \quad \text{for } k < N_k - 2, \quad (50)$$

$$A'_{II}(Z_k) = 2A'_I(Z_k) - A'_{k+1}, \quad \text{for } k = N_k - 2, \quad (51)$$

for the  $W_k < 0$  case. The age derivative at the surface is required ( $A'_{k+1}$  in Eq. 51), which is provided as a boundary condition (Eq. 40). For higher-order numerical schemes, the introduction of a slope limiter is a standard method for suppressing the development of oscillations near a discontinuity and/or steep gradients (details are described in Greve et al., 2002). Although it is possible to apply such slope limiters in irregular grids (Murman et al., 2005), an easier approach was adopted instead. Specifically, the formulation is switched back to the first-order scheme when  $A'_I > 0 > A'_{II}$  or  $A'_I < 0 < A'_{II}$ . Although this method may be insufficient to stabilize the solution near a strong discontinuity, the implementation of more sophisticated slope limiters is beyond the scope of the present paper.

### 3 Experiment and Results

#### 3.1 Experimental design

Following some modeling studies on the dating of deep drilling sites that used simplified 1D vertical ice flow models (e.g., Parrenin et al., 2007), the present study adopts an analytical vertical velocity profile under the assumption that there are no horizontal variations in the bedrock elevation, surface, and basal mass balances:

$$w(\zeta) = - \left[ \left( M_s + M_b - \frac{\partial H}{\partial t} \right) \tilde{w}(\zeta) - M_b \right], \quad (52)$$

where  $M_s$  and  $M_b$  are the surface and basal mass balance (positive is input), respectively,  $H$  is the ice thickness, and  $\tilde{w}(\zeta)$  is the normalized velocity profile. Assuming no basal sliding,  $\tilde{w}(\zeta)$  can be approximated by

$$\tilde{w}(\zeta) = 1 - \frac{p+2}{p+1}(1-\zeta) + \frac{1}{p+1}(1-\zeta)^{p+2}, \quad (53)$$

where  $p$  is a parameter for the profile (Parrenin et al., 2007). Under the Glen's flow law with a steady-state isotropic ice condition,  $p$  is equal to the flow law exponent  $n$  (typically  $n = 3$ ). In addition, the RCIP scheme requires the derivative of the velocity, which is computed using the derivative of  $\tilde{w}$ , as

$$\frac{\partial \tilde{w}}{\partial \zeta} = \frac{p+2}{p+1} [1 - (1-\zeta)^{p+1}]. \quad (54)$$

In addition to the vertical velocity, the time evolution of the surface and basal mass balances and the ice thickness are required for the age computations. These will be presented in each of the following sections.

The initial conditions of the  $\mathcal{A}$  and  $\mathcal{A}'$  fields are set to 0 for all our experiments. In these cases, the age derivative  $\mathcal{A}'$  is kept 0 under the level at which the age reaches the integration time. Starting from the 0 field, time integration is computed for 2000 kyr for most of our experiments.



All the computations of our present study were performed on a personal computer (PC) equipped with an Intel Xeon E5-2609 central processing unit (CPU) and compiled with GNU Fortran. Each surface/basal mass balance, ice thickness, and vertical resolution configuration is repeated using four numerical schemes: the RCIP with departure correction (RCIP+corr), the RCIP without correction (RCIP), the second-order upwind scheme (UP-2), and the first-order upwind scheme with mid-point rule (UP-1). Additionally, the first-order scheme without mid-point rule (UP-1n) is sometimes used. Details differ among the configurations, and it takes 30 to 40% more time to perform a RCIP+corr run than to perform a UP-2 or UP-1 run.

### 3.2 A verification experiment using uniform velocity

Before performing an experiment under a typical ice sheet configuration, verification of the numerical model used in the present study is presented under further simplified conditions, namely, the constant velocity case. This is easily performed using Eq. (52), in which the parenthesis term equals 0, in other words, by keeping  $H$  constant and arbitrarily setting  $M_s \equiv -M_b$  for  $p$ .

Figure 1 shows the computed age profile under the uniform velocity of  $-15 \text{ cm yr}^{-1}$  and  $H = 3000 \text{ m}$ . Uniform grid-spacing of 129 levels is adopted, which corresponds to  $Z \equiv \zeta$  and  $\Delta Z = \Delta \zeta = 1/2^7$  (i.e.,  $\Delta z = 23.4375 \text{ m}$ ) using the smooth grid. The time step is set as 100 yr, which corresponds to the Courant–Friedrichs–Lewy (CFL) condition  $\sim 0.64$ . The vertical age profile is formulated as

$$A(z, t) = \min \left[ t, \int_h^z dz' \frac{1}{w} \right], \quad (55)$$

thus the exact solution for an uniform velocity is

$$A(z, t) = \min(t, -z/w_c), \quad (56)$$

where  $w_c = -15 \text{ cm yr}^{-1}$ . For completion purposes, the results of the RCIP scheme are plotted in the figure, which is (by definition) identical to those of RCIP+corr scheme. For the steady state, a linear age profile from 0 yr at the surface and 20 kyr at the bottom is expected (corresponding to the thick gray line in Fig. 1), which is obtained by all the methods after integration of around 27 kyr (not shown). In contrast, the transient states are different among the results of the four schemes examined. Figure 2 shows the computed age profile relative to the exact solution, with three different time steps, 100, 50, and 25 yr, for each scheme. The results of RCIP+corr (and thus RCIP) are shown to be less sensitive to the time step than the upwind schemes, which reflects the fact that both the interpolation and the departure point calculation are successful. At 20 kyr, a linear age profile should be obtained, but all four results show ages that are younger than the exact solution, due to numerical diffusion. Additionally, while all of the schemes show relatively good performance for the upper part, the result obtained by the UP-1 scheme deviates the most from the solution. Specifically, it deviates 1 yr from around 2/3 of the total depth and reaches almost 1 kyr at the bottom, which is already visible in Fig. 1. In contrast, the other results deviate from the solution only near the bottom around 9/10 of the total depth, and reach around 100 yr, or even less, at the bottom. The error at the bottom of UP-1 is 759 to 902 yr (3.8 to 4.5%), while that of RCIP is 76 to 98 yr (0.38 to 0.49%), and the best of UP-2 is even better at 7.5 to 154 yr (0.04 to 0.77%).

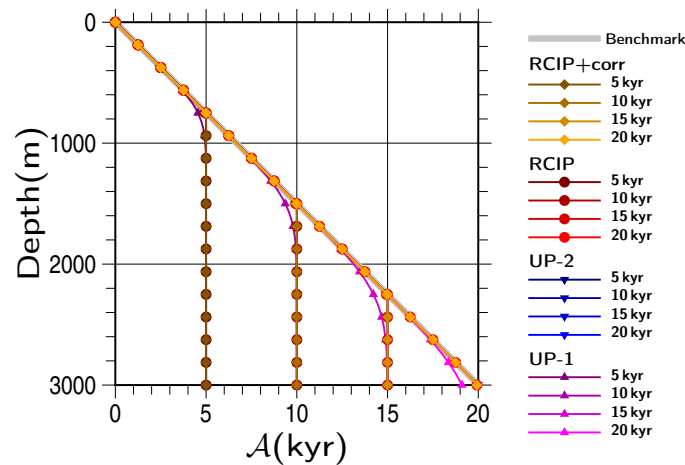

**Figure 1.** Experimental result obtained using a uniform velocity of  $w = 15 \text{ cm yr}^{-1}$ . Snapshots of the computed vertical age profiles obtained by RCIP with correction, RCIP, second-, and first-order upwind schemes at  $t = 5, 10, 15, 20 \text{ kyr}$  are shown. Since the ‘correction factor’ of the departure points is 1 (Eq. 28), the results of RCIP with correction are identical to those of RCIP. The results of the second-order upwind scheme are close to those of the RCIP, which are barely visible in this scale. The solution is also shown as a benchmark (thick gray line). Symbols are plotted for every eight vertical levels.

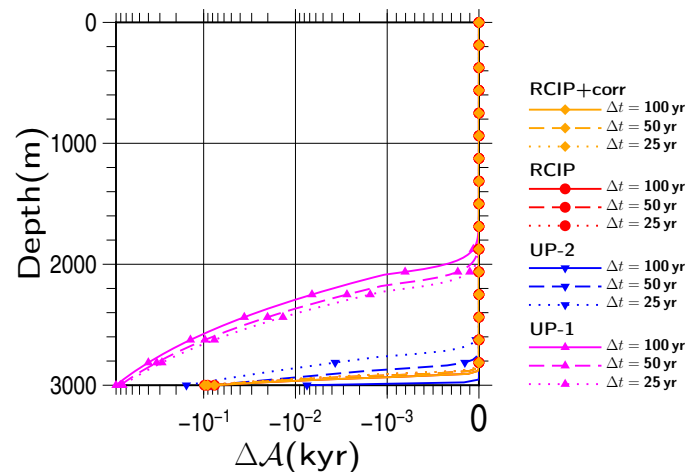

**Figure 2.** Experimental results obtained using a uniform velocity of  $w = 15 \text{ cm yr}^{-1}$ . Snapshots of computed vertical age profiles obtained by RCIP with correction, RCIP, and second- and first-order upwind schemes at  $t = 20 \text{ kyr}$  relative to the exact solution are shown. The results of different time steps of 100, 50, and 25, yr are shown for each scheme. The results of RCIP with correction are identical to those of RCIP. Age differences are shown on a logarithmic scale, except for those near 0, which are shown on a linear scale. Symbols are plotted for every eight vertical levels.

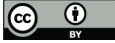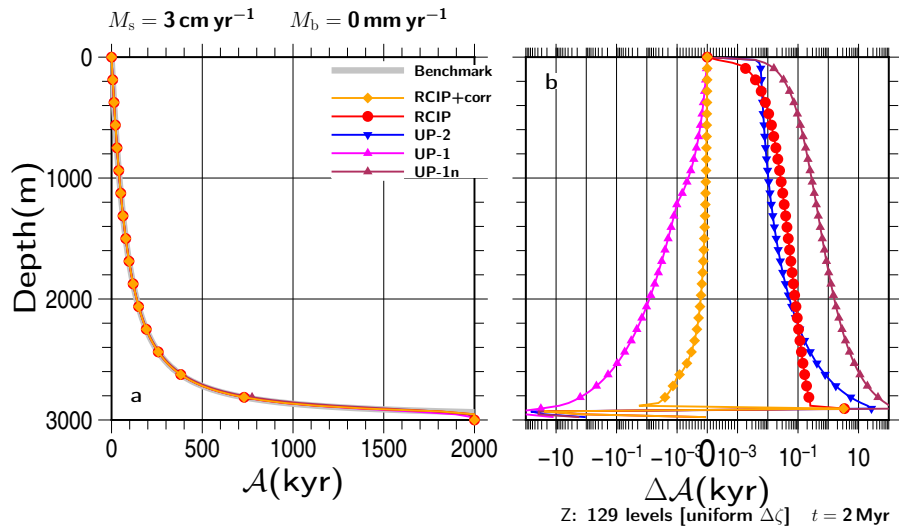

**Figure 3.** Experimental results obtained under steady vertical velocity profiles with  $H = 3000\text{ m}$ ,  $M_s = 3\text{ cm yr}^{-1}$  and  $M_b = 0\text{ mm yr}^{-1}$ . (a) Computed vertical age profiles by RCIP with departure point correction (RCIP+corr), the RCIP scheme, the second-order upwind scheme (UP-2), the first-order upwind scheme (UP-1), and the first-order upwind scheme without the mid-point rule (UP-1n) at  $t = 2000\text{ kyr}$ , (b) those relative to the *benchmark* profile obtained by numerical integration. Age differences are shown on a logarithmic scale, except for those near 0, which are shown on a linear scale. Uniform grid-spacing of 129 levels is adopted in this simulation.

### 3.3 Experiment with steady non-uniform vertical velocity

Hereafter, non-uniform velocity experiments are performed using  $p = n = 3$  in Eq. (53). First, simple cases with constant surface/basal mass balances, as well as thicknesses that correspond to steady vertical velocity profiles, are shown. Since Eq. (55) cannot be solved using (52), profiles created by numerical integration (the Runge–Kutta scheme) are used as ‘benchmark’ solutions in this and the following section.

Two sets of basal melting are presented: no basal melting and  $3\text{ mm yr}^{-1}$ . The other two parameters are fixed. Surface mass balance is set as  $3\text{ cm yr}^{-1}$  and thickness is set as  $H = 3000\text{ m}$ . Uniform grid-spacing of 129 levels ( $\Delta z = 23.4375\text{ m}$ ), and the time step is set as  $100\text{ yr}$ , which is the same configuration used in the previous section.

Figures 3a and 4a show computed age profiles at  $t = 2000\text{ kyr}$  for all the schemes along with the *benchmark* age profiles. Very few differences can be seen among the profiles over most parts of the figures under this scale. Deviations from the benchmark are shown in Figs. 3b and 4b. The results of each scheme show larger errors near the bottom than near the upper part. Some results show sudden increases in the error at certain depths, which correspond to the depths around where the age should reach the time of integration.

The RCIP+corr scheme shows the best result for all depths. The UP-1 scheme shows the second best result, which is even better than the RCIP scheme around the depth of  $2600\text{ m}$ . However, it also shows the largest errors among all the schemes examined at deeper depths. The good performance of UP-1, in spite of its smallest spatial accuracy, which is attributed to the

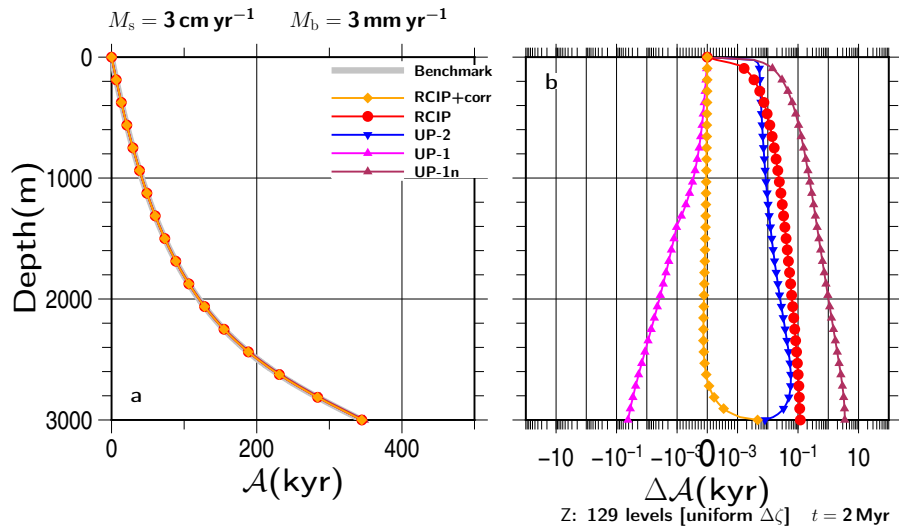

**Figure 4.** Same as Fig. 3, except for the experiment with  $M_b = 3 \text{ mm yr}^{-1}$ .

cancellation of errors due to discretization and numerical diffusion, has already been presented in Greve et al. (2002). The mid-point rule formulation (Eq. 47) also plays a role in the increased accuracy. Due to simple situations such as the one-direction advection and the constant upper boundary conditions, the age profile computation can be formulated as cal integration  
 285 from top to bottom. This means that the mid-point rule integration actually has second-order accuracy. A *true* first-order upwind scheme can be applied by using Eq. (48) over the whole domain. In this case, vertical integration from top to bottom corresponds to an Euler integration, which has first-order accuracy. Figures 3b and 4b also contain results obtained using such a scheme, marked as UP-1n. However, as expected, when such a normal-grid velocity is introduced for the advection equation, the results have less accuracy than those of the second-order upwind (UP-2). Furthermore, as shown in Greve et al. (2002), the  
 290 improved performance of the UP-1 scheme is limited to the upper part, and the errors become larger as the depth increases. The results of the RCIP scheme show relatively larger errors than the other methods, except for the top and the bottom part, which highlights the importance of accurate departure point calculations. The result of the UP-2 scheme shows intermediate errors between RCIP and UP-1 at the bottom.

### 3.4 Non-steady surface mass balance experiments

295 This section presents the results of experiments conducted with non-steady velocity profiles, which were performed with the prescribed surface mass balance time series. First,  simple square-wave formulation is adopted for the time evolution of the surface mass balance.

$$\begin{cases} M_s(t) = a_H, & (0 \leq \text{mod}(t, P_T) < P_H) \\ M_s(t) = a_L, & (P_H \leq \text{mod}(t, P_T) < P_T = P_H + P_L) \end{cases} \quad (57)$$

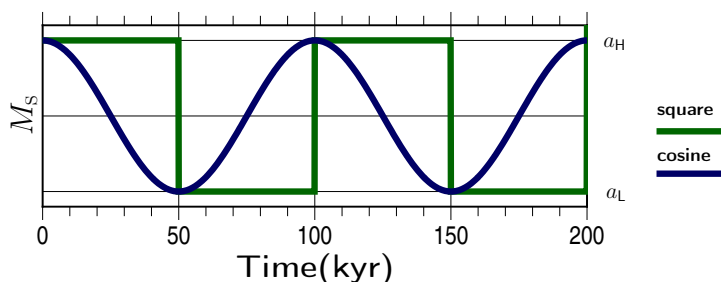

**Figure 5.** Schematic figure showing the time evolution of the surface mass balance adopted in these experiments. Only the first two cycles are plotted.

where  $a_H$  and  $a_L$  are the prescribed high and low surface mass balance terms,  $P_H$  and  $P_L$  are the durations with high- and low-value phases, and  $P_T$  is the duration of one cycle. Figure 5 shows the time evolution of a normalized surface mass balance with  $P_T = 100$  kyr cycles and a phase pattern of  $P_H, P_L = 1 : 1$  as an example. Several experimental configuration combinations are examined, including  $P_H, P_L = 1 : 1, 7 : 1$ , or  $1 : 7$ ; and  $M_b = 0, 0.3$ , or  $3 \text{ mm yr}^{-1}$ . The other patterns examined in this paper are provided as a Supplement to this paper.

Figures 6 and 7 show computed age profiles at  $t = 1000$  kyr under the square-wave surface mass balance, where the lower surface mass balances are set as  $a_L = 1.5 \text{ cm yr}^{-1}$  and  $0.75 \text{ cm yr}^{-1}$ . The higher surface mass balances and the basal are set as  $a_H = 3 \text{ cm yr}^{-1}$  and  $M_b = 0$ , respectively. For reference purposes, the benchmark solutions with constant surface mass balances of  $a_H$  and  $a_L$  are shown with gray lines. The black line is the benchmark solution with the constant surface mass balances of the mean,  $a_M = (a_H + a_L)/2$ . As shown in these figures, the computed age profiles are close to the benchmark solution with  $a_M$ , particularly at the bottom. For the upper part, the computed age profiles are along the benchmark solutions for the constant surface mass balance cases of  $a_L$ .

Since there are few visible differences among the computed ages, the computed age profiles relative to the one produced by the RCIP+corr scheme (Fig. 6b) are shown. The figures show comparable relative performance levels in spite of the different input surface mass balance histories. The age profiles produced by the RCIP scheme deviate systematically from RCIP+corr by less than 1 kyr throughout the depth range, which reflects the differences in computing the departure points. The other two schemes deviate around 10 kyr at most. The age difference oscillations seen in the UP-2 and UP-1 schemes are visible near the age corresponding to the time when switching was conducted between the high and low surface mass balances. ( $\Delta A$  vs  $A$  plots are presented in the Supplement). These oscillations reflect the characteristics of the UP-2 and UP-1 schemes at the discontinuities.

Figures 6c and 7c show the computed annual layer thickness,  $\lambda$ , against the depth. In the present paper, the annual layer thickness is defined as the inverse of the age gradient. For the RCIP+corr and RCIP methods, the computed field of the age derivative itself ( $A'$  in Eq. 44) is used with the coordinate transformation. On the other hand, for the UP-2 and UP-1 methods, the diagnosed field is used ( $A'_{\text{I}}$  or  $A'_{\text{II}}$  in Eqs. 47, 50, 51, respectively). An infinite or a very large annual layer thickness may

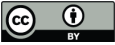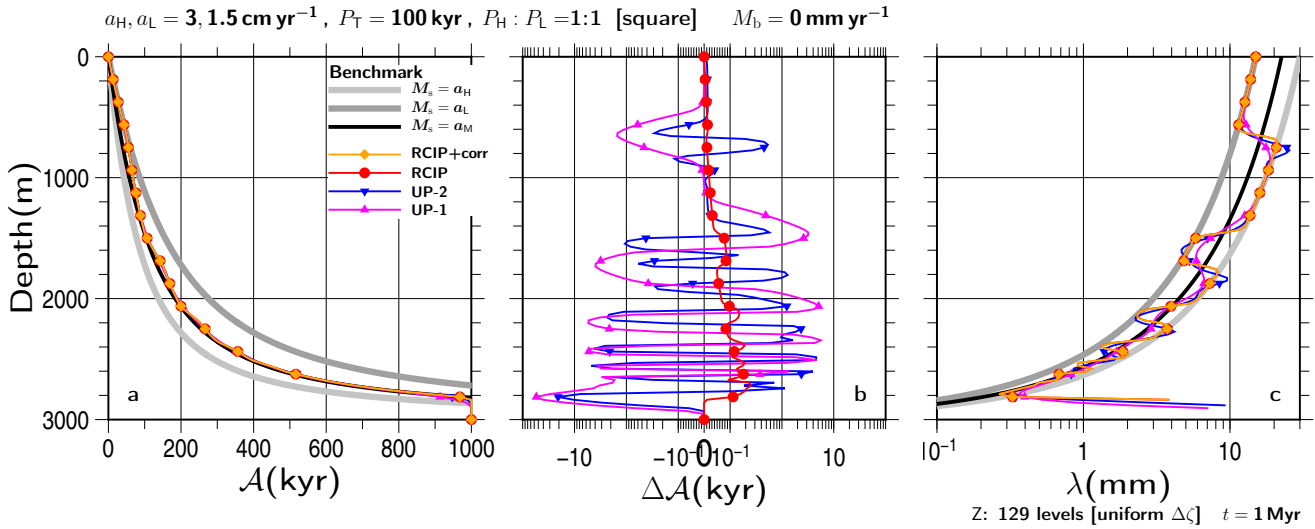

**Figure 6.** Results of transient experiments with square-wave surface mass balances of  $a_H, a_L = 3, 1.5 \text{ cm yr}^{-1}$ ,  $P_T = 100 \text{ kyr}$ ,  $P_H : P_L = 1 : 1 = 50 : 50 \text{ kyr}$ , square-wave,  $M_b = 0$ , and constant  $H = 3000 \text{ m}$ . (a) Vertical profiles of the computed age and (c) annual layer thickness at 1000 kyr using RCIP+corr, RCIP (overlapped on RCIP+corr), UP-2, and UP-1 are shown. The last 500 yr is clipped from (c), where the age gradient (inverse of  $\lambda$ ) is close to 0 reflecting the initial condition. (b) The computed age differences at the same depth relative to the result of the RCIP+corr case are shown on a logarithmic scale, except for those near 0, which are shown on a linear scale. For reference purposes, the gray lines indicate benchmark solutions for the constant surface mass balance cases of  $a_H, a_L$ , and  $a_M$ . Uniform grid-spacing of 129 levels is adopted in this simulation.

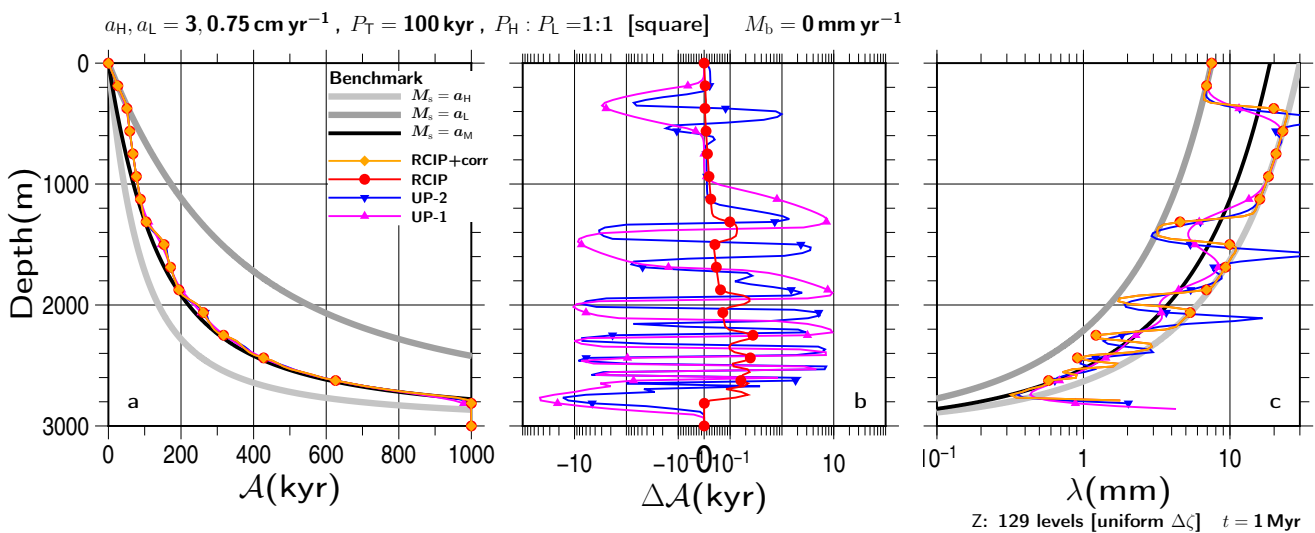

**Figure 7.** Same as Fig. 6, but for the results of transient experiments using a square-wave surface mass balance of  $a_L = 3, 0.75 \text{ cm yr}^{-1}$ .



be present near the bottom, due to the zero gradient of age as a consequence of the initial experiment conditions. In this study, the last 500 yr is clipped from the figures.

325 The annual layer thickness has the following relationship in terms of the thinning rate:

$$\frac{\partial \lambda}{\partial t} = \frac{\partial w}{\partial z} \lambda \quad (58)$$

while assuming that layers remain horizontal (Cuffey and Paterson, 2010). When the basal mass balance is 0 and the thickness is constant, the vertical velocity gradient can be formulated from Eq. (52) as

$$\frac{\partial w}{\partial z} = -M_s \frac{\partial \tilde{w}}{\partial \zeta} \quad (59)$$

330 Finally after some derivation, the vertical gradient of annual layer thickness can be formulated as

$$\frac{\partial \lambda}{\partial z} = \frac{\lambda}{\tilde{w}} \frac{\partial \tilde{w}}{\partial \zeta} \quad (60)$$

which is a function of  $\lambda$  and the normalized vertical velocity shape. This experiment was conducted with zero basal mass balance, constant thickness, and the same normalized velocity. Therefore, the vertical profile of the annual layer thickness should go back and forth on the two lines produced by those computed using the constant surface mass balances.

335 In terms of computed annual layer thickness profiles, the RCIP+corr and RCIP (which overlap with RCIP+corr in the figure) methods show particularly good performance over the upper part, as shown in Figs. 6c and 7c. Dissipation at the discontinuity becomes larger towards the bottom, but the solution of RCIP+corr (RCIP) is somewhat more stable on the two benchmark lines than the other schemes. Overshooting at the discontinuity is shown for the solution by the UP-2 scheme, which becomes larger as the difference between the high and low surface mass balances increases. In the present study, this is considered to  
340 be a consequence of an inadequate slope filter. In addition, the annual layer thickness is diagnosed with Eq. (50) for the UP-2 scheme, which may exaggerate the oscillation of age gradients more than the simple first-order Taylor expansion. For the UP-1 scheme results, the annual layer thickness diffuses with the depth level and approaches the constant accumulation case of its mean. In deeper areas, the annual layer thickness is found in the vicinity (above or below) of the mean  $a_M$  benchmark profile in all of the numerical schemes.

345 The same exercises were performed using a different shape for the time evolution of the surface mass balance. Figures 8 and 9 are the results of an experiment conducted using the cosine-wave formulation of the surface mass balance (Fig. 5), which is relatively more continuous than the square-wave version. Similar performance levels were obtained by the UP-2 and RCIP+corr (RCIP) methods for the small amplitude case (Fig. 8c). Instability also arises at low-to-high transitions when the ratio of high/low accumulation is larger (Fig. 9c).

350 Figure 10 shows the results obtained by square-wave forcing in terms of computed annual layer thickness,  $\lambda$ , against the computed age for all the schemes, obtained by the relative duration of the  $P_H : P_L = 1 : 1$  case (similar figures obtained by other experimental configurations are archived in the Supplement). Since the periodicity of the input cycle is 100 kyr in this experiment, the annual layer thickness profiles should show the same periodicity. The obtained results show relatively good performance for the RCIP+corr(RCIP) scheme in terms of the phases when compared with the UP-2 and UP-1 schemes.



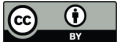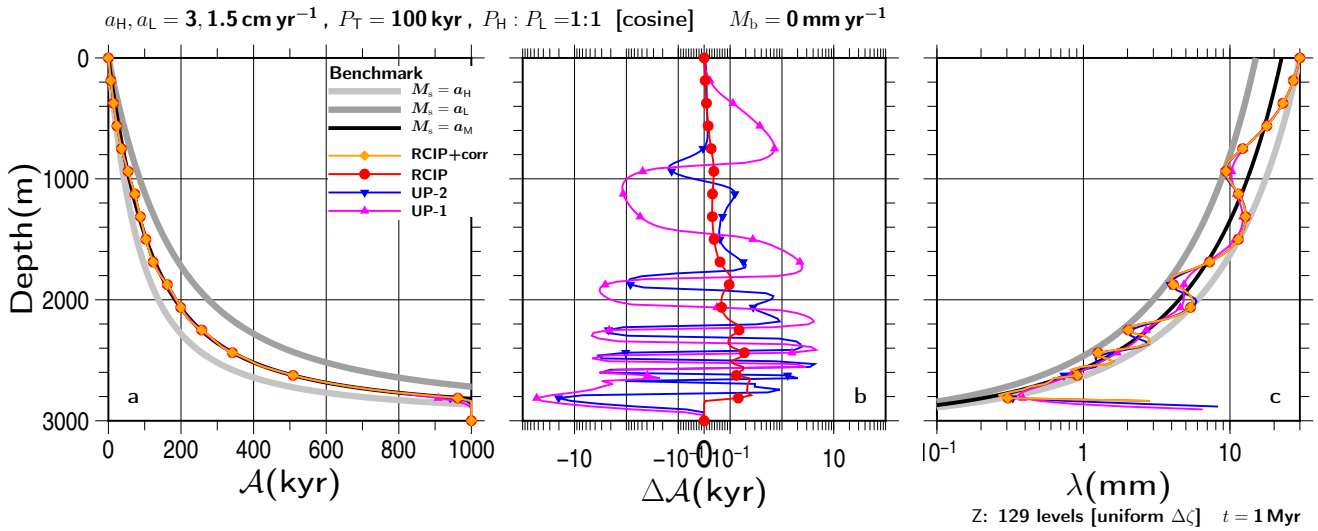

**Figure 8.** Same as Fig. 6, but for the results of transient experiments conducted with a cosine-wave surface mass balance of  $a_H, a_L = 3, 1.5 \text{ cm yr}^{-1}$ .

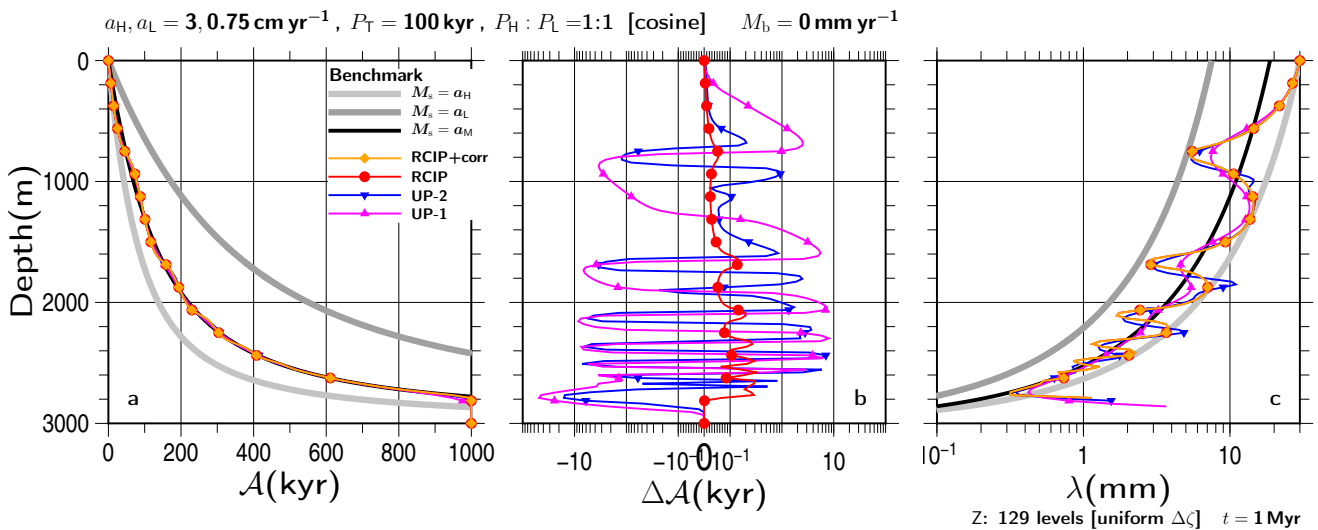

**Figure 9.** Same as Fig. 6, but for the results of transient experiments conducted with a cosine-wave surface mass balance of  $a_H, a_L = 3, 0.75 \text{ cm yr}^{-1}$ .

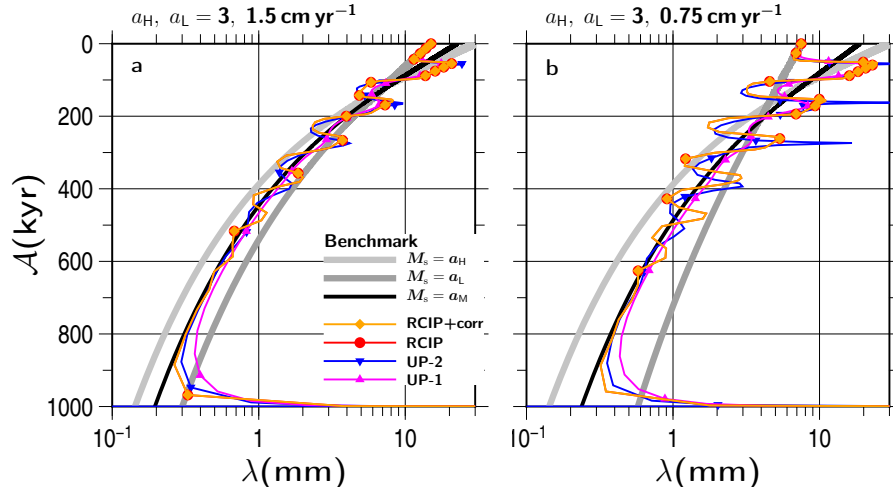

**Figure 10.** Results of transient experiments with square-wave surface mass balances of (a)  $a_H, a_L = 3, 1.5 \text{ cm yr}^{-1}$  and (b)  $3, 0.75 \text{ cm yr}^{-1}$  with high- and low-value phase durations (Eq. 57) set as  $P_H : P_L = 1 : 1 = 50 : 50 \text{ kyr}$ . The basal mass balances are set as 0. The computed annual layer thickness of  $\lambda$  against the computing age is shown (RCIP overlaps with RCIP+corr). The gray lines indicate benchmark solutions of the constant surface mass balance cases of  $a_H$  and  $a_L$ , while the black lines  $a_M = (a_H + a_L)/2$  are provided as references. Uniform grid-spacing of 129 levels is adopted in this simulation.

355 Dissipation at the discontinuity blur the square-wave shapes, particularly at the deeper part, but the phases are still maintained better by the RCIP+corr (RCIP) scheme than by the UP-2 scheme.

### 3.5 Non-steady thickness experiments

The time evolution of the surface mass balance often involves the evolution of ice thickness as a response. In this section, age computation performance levels under non-steady mass balance and ice thickness conditions are presented. In the present  
 360 paper, the time evolution of thickness is computed as follows:

$$\frac{\partial H}{\partial t} = -\frac{1}{\tau_H} \{H - H_{\text{ref}}(M_s)\}, \quad (61)$$

where  $H_{\text{ref}}(M_s)$  is the reference thickness as a function that depends solely on the surface mass balance and  $\tau_H$  is the response thickness timescale. Under an idealized condition, the steady-state ice thickness at the summit is proportional to the  $1/(2n+2)$  power of the surface mass balance, where  $n$  is the Glen's flow law exponent (Cuffey and Paterson, 2010). Following this  
 365 relationship, the reference thickness is formulated as

$$H_{\text{ref}}(M_s) = H(t=0) \left[ \frac{M_s(t)}{M_s(t=0)} \right]^{1/(2n+2)}. \quad (62)$$

For cases where  $H(t=0) = 3000 \text{ m}$ ,  $a_H, a_L = 3, 1.5 \text{ cm yr}^{-1}$  and  $P_T = 100 \text{ kyr}$ , the evolution of  $H$  over the first two cycles can be computed as shown in Fig. 11 using Eqs. (61) and 62. The lower thickness limit in this case is  $3000 \times (1.5/3.0)^{1/8} \sim 2751.01 \text{ m}$ .

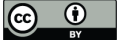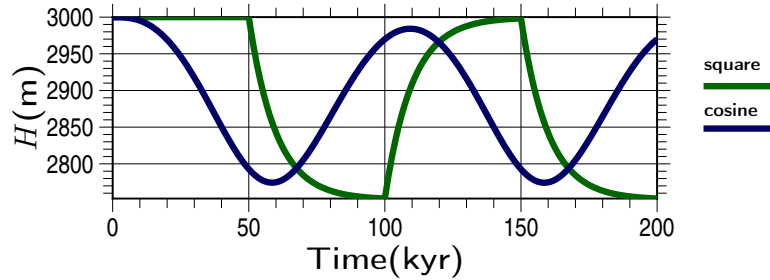

**Figure 11.** Prescribed time evolution patterns of ice thickness adopted in the non-steady thickness experiment. The evolution of thickness is computed using the e-folding time of 10 kyr against square-wave and cosine-wave formulation of the surface mass balance with  $a_H, a_L = 3, 1.5 \text{ cm yr}^{-1}$  (Fig. 5) provided as an example.

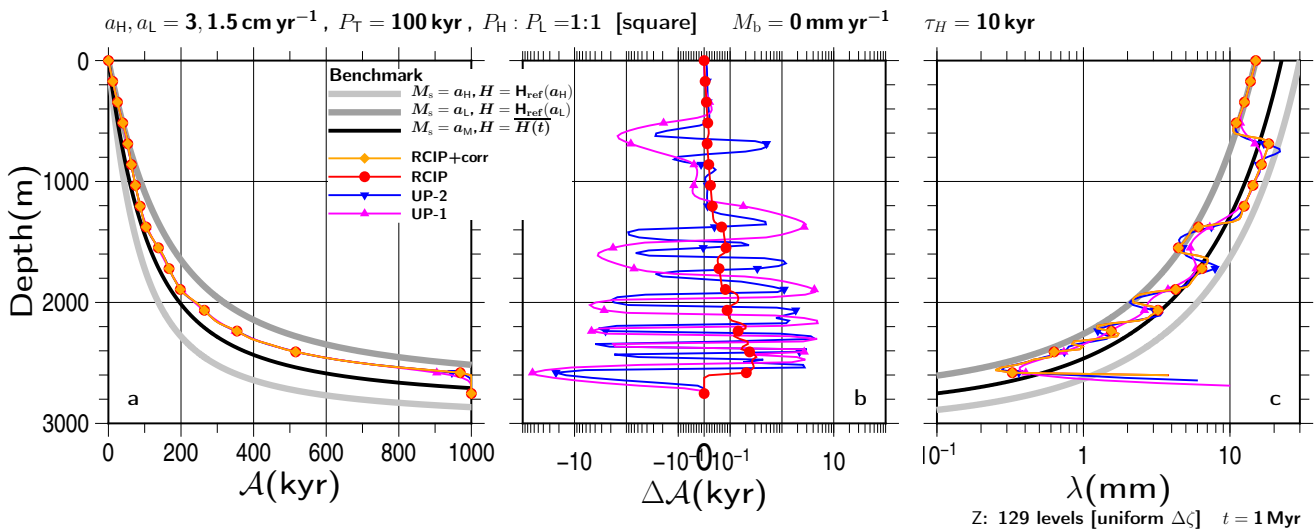

**Figure 12.** Same as Fig. 6, but for the results of non-steady thickness experiments conducted with the response timescale set as  $\tau_H = 10 \text{ kyr}$ . The reference thickness values  $H$  for the benchmark profiles are explained in the text.

370 Several experimental configuration combinations are examined. These include square-wave or cosine-wave forcing;  $a_H, a_L = 3, 1.5 \text{ cm yr}^{-1}$  or  $3, 0.75 \text{ cm yr}^{-1}$ ;  $\tau_H = 3 \text{ kyr}$  or  $10 \text{ kyr}$ ;  $P_H, P_L = 1 : 1, 7 : 1, \text{ or } 1 : 7$ ;  $M_b = 0, 0.3, \text{ or } 3 \text{ mm yr}^{-1}$ . Figures 12 and 13 are the results of experiments conducted with response time scales of 10 kyr under 100 kyr cycle square-wave and with cosine-wave forcing cases provided as examples. The gray lines in the figures are the benchmark solution with constant surface mass balances of  $a_H$  and  $a_L$  and their corresponding reference thickness of  $H_{\text{ref}}$ . The black line is computed using the mean surface mass balance  $a_M = (a_H + a_L)/2$ , and the mean thickness over the last cycle of its evolution.

375

A comparison with the fixed thickness experiments (Figs. 6 and 8 vs Figs. 12 and 13) show no significant differences. The preservation of discontinuity in the annual layer thickness is similar to that seen in the non-steady thickness case. The differences in computed age as well as the performance levels of the phases in the annual layer thickness are qualitatively the

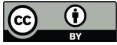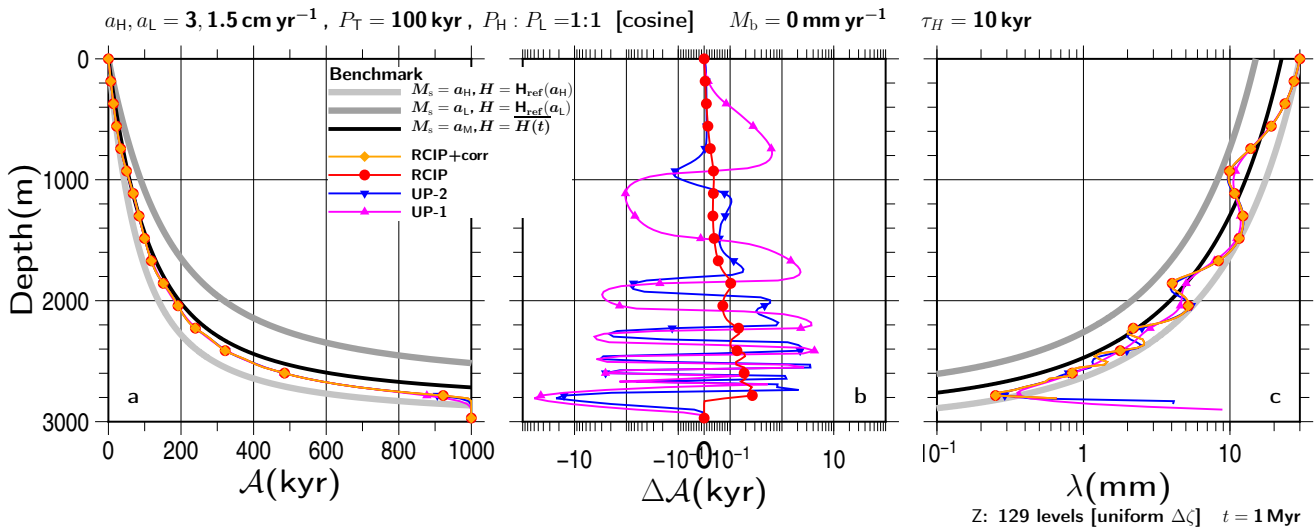

**Figure 13.** Same as Fig. 8, but for the results of non-steady thickness experiments conducted with the response timescale set as  $\tau_H = 10$  kyr. The reference thickness values  $H$  for the benchmark profiles are explained in the text.

380 same. In addition, all of the combinations examined in this paper show corresponding results that are qualitatively similar to those obtained in the fixed thickness experiments.

### 3.6 Occasional non-positive surface mass balance experiments

385 So far, the surface mass balance values adopted in our experiments have been positive (corresponding to the accumulation zone). This limitation is sufficient for the usual topics relating to deep ice-core experiments where interpretation of ice-core data may become too complex. However, in order to provide a complete demonstration of the performance levels of numerical age computations for more general cases, it is worthwhile to examine other cases. Although it may be considered pointless to examine steady negative mass balance cases because they simply mirror the steady positive cases presented above, the surface mass balance level adopted in this section is examined with zero or negative  $a_L$  in Eq. (57) and Fig. 5. One encountered difficulty is computing vertical velocity when the surface mass balance is negative. Strictly speaking, it is possible to apply negative  $M_s$  to Eqs. (52) and (53), but the validity of such a formulation may be questionable because it is based on an idealized steady-state ice-sheet solution under positive surface mass balance conditions (e.g., Rybak and Huybrechts, 2003). However, for the sake of simplicity, the vertical velocity profiles in the current study are prescribed using the same set of equations for both positive and negative surface mass balances. This is considered to be sufficient, particularly for evaluations of scheme numerical performance levels 

395 Figure 14 is the result of transient experiments conducted under the square-wave surface mass balance of  $a_L = 0$  cm yr<sup>-1</sup>, while the other configuration is the same as Fig. 6 or 7. Figure 15 is a configuration with  $a_L = -1.5$  cm yr<sup>-1</sup>. The thickness is fixed as 3000 m, the mass balances are  $a_H = 3.0$  cm yr<sup>-1</sup>,  $M_b = 0$ , and the phases are  $P_H, P_L = 50, 50$  kyr.

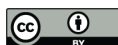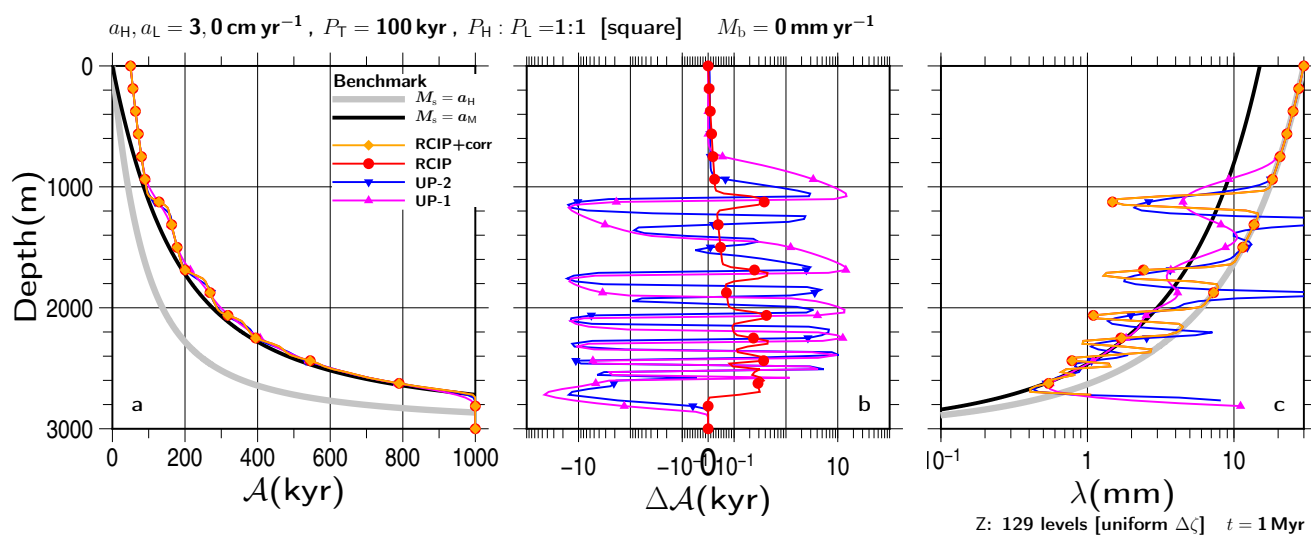

**Figure 14.** Same as Fig. 6, but for the results of transient experiments conducted using a square-wave surface mass balance with  $a_L = 0 \text{ cm yr}^{-1}$ .

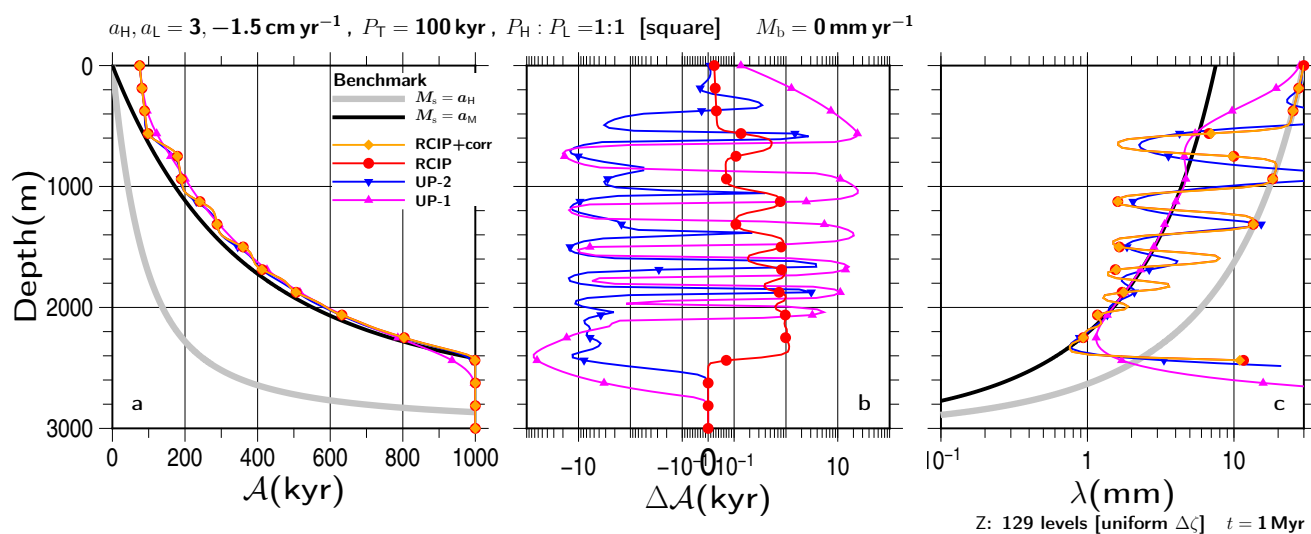

**Figure 15.** Same as Fig. 6, but for the results of transient experiments conducted using a square-wave surface mass balance with  $a_L = -1.5 \text{ cm yr}^{-1}$ .



Several experimental configuration combinations are examined. In a comparison with the experimental results of the positive mass balance cases examined in this paper, qualitatively similar results are presented. As the prescribed surface mass balance at the lower  $a_L$  becomes smaller, errors in the annual layer thickness become clearer around middle depth. The  $\lambda$  by the RCIP+corr(RCIP) scheme at the 1600m depth and below do not extend to the reference gray line (Figs. 14c and 15c). This is due to the lack of sufficient vertical resolution when capturing the variation. However, the results are still better than those obtained from the other schemes.

### 3.7 Resolution

Annual layer thickness becomes smaller with depth, which reflects the vertical velocity profile. Therefore, differences in age between two neighboring levels become larger with increasing depth. At a certain depth, the grid-spacing becomes insufficient to hold the variation of the input age cycles, which means that the preservation of the input variation is lost below that depth. Typically, in the experiments shown above, 100kyr-cycle properties of input surface mass balance are maintained at around 300 to 500kyr with the RCIP+corr(RCIP) scheme, and the computed age becomes smoother before that age (e.g., the square-wave shape in Fig. 10). The results obtained by UP-2 show loss of variation at similar or shallower depths, and those by UP-1 do so at even shallower depths, which results from the numerical diffusion of the schemes.

In the same manner as computing an approximate depth-age solution under constant surface/basal mass balance and constant thickness (e.g., the gray benchmark lines in Fig. 6a), the inverse age-depth solution can be also computed. Using this solution, the vertical profiles of layers that are sufficient to hold a constant age difference ( $T_{res}$ ) can be obtained. Figure 16b shows four gray lines, which correspond to  $\Delta\zeta$  sufficient to hold the 10, 5, 2, and 1 kyr differences when the experiment configuration is constant at  $M_s = 1.5 \text{ cm yr}^{-1}$ ,  $M_b = 0$ , and  $H = 3000 \text{ m}$ . It is worth mentioning that for other  $M_s$  cases with the same  $M_b$  and  $H$  constant, the four reference  $\zeta$ - $\Delta\zeta$  relationships correspond to those with  $T_{res}$  divided by the factor of  $M_s$  for  $M_s = 3 \text{ cm yr}^{-1}$ , and that they are interpreted as  $T_{res} = 5, 2.5, 1, \text{ and } 0.5 \text{ kyr}$ , respectively, while  $M_s = 0.75 \text{ cm yr}^{-1}$  as  $T_{res} = 20, 10, 4, \text{ and } 2 \text{ kyr}$ , respectively. Therefore, the  $\Delta\zeta$  limit estimated by using the lower surface mass balance of the experiment should be considered. For example, if the grid size at a  $\zeta$  is larger than the  $T_{res} = 2 \text{ kyr}$  line, characteristics with higher frequencies than  $T_{res}$  cannot be sampled. The vertical line marked as Z: 129e in Fig. 16b corresponds to uniform grid-spacing of 129 levels adopted in the experiments conducted thus far. As the figure shows, this discretization can hold 2, 5, and 10 kyr differences by  $\zeta \sim 0.82, 0.44, \text{ and } 0.29$ , respectively, and the 1 kyr is not resolved.

Figure 17 is the same as Fig. 6c, except for the results using the different  $P_T$  of 50, 20, and 10 kyr. As shown in the figure, higher-frequency properties disappear at shallower depths. The results of RCIP(RCIP+corr) keep the oscillation relatively stable, but the computed annual layer thicknesses are not on the lines of the constant mass balance cases (gray lines), even at shallow depths, for high-frequency input (Fig. 17c). The square-wave shape pattern seems to be well preserved, at least around the 1700m depth ( $\zeta \sim 0.44$ ) in Fig. 17a, and around the 600m depth ( $\zeta \sim 0.8$ ) in Fig. 17b. Therefore, in a comparison with Fig. 16, it can be roughly estimated that  $T_{res} = 5 \text{ kyr}$  and  $T_{res} = 2 \text{ kyr}$  or longer are necessary to resolve the  $P_T = 50 \text{ kyr}$  and  $P_T = 20 \text{ kyr}$  square-wave shapes, respectively, which correspond to  $1/10P_T$ .

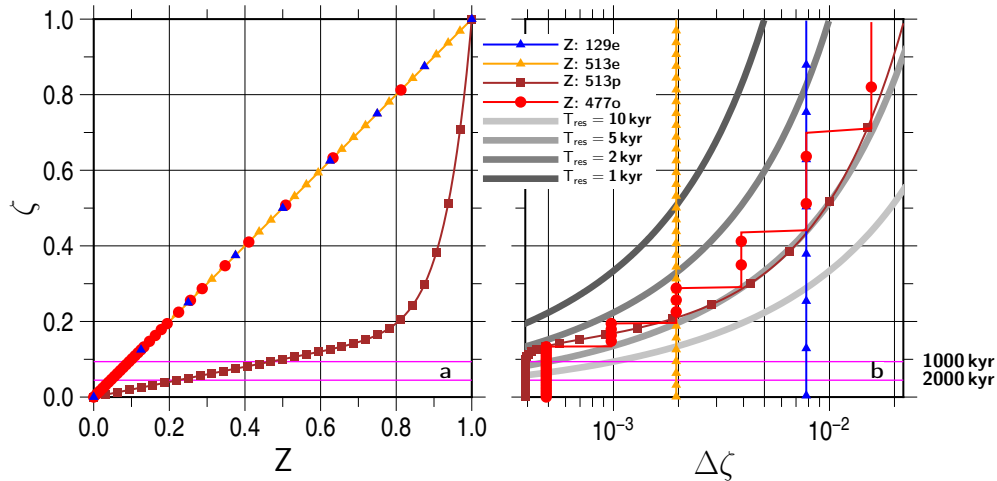

**Figure 16.** Vertical discretization adopted in the present study: (a)  $Z$  vs  $\zeta$  (b)  $\Delta\zeta$  vs  $\zeta$ . Four patterns are shown: uniform grid-spacing of 129 levels (129e), that of 513 levels (513e), a smooth non-uniform discretization (513p, see text), and a non-smooth, non-uniform discretization (477o, see text). Symbols are plotted for every 16 vertical levels. The four gray lines in (b) correspond to the layer thickness necessary to resolve 10, 5, 2, and 1 kyr differences, under the condition of  $M_s = 1.5 \text{ cm yr}^{-1}$ ,  $M_b = 0$ , and  $H = 3000 \text{ m}$ . The two horizontal magenta lines correspond to the depth needed to reach 1000 and 2000 kyr under the same conditions.

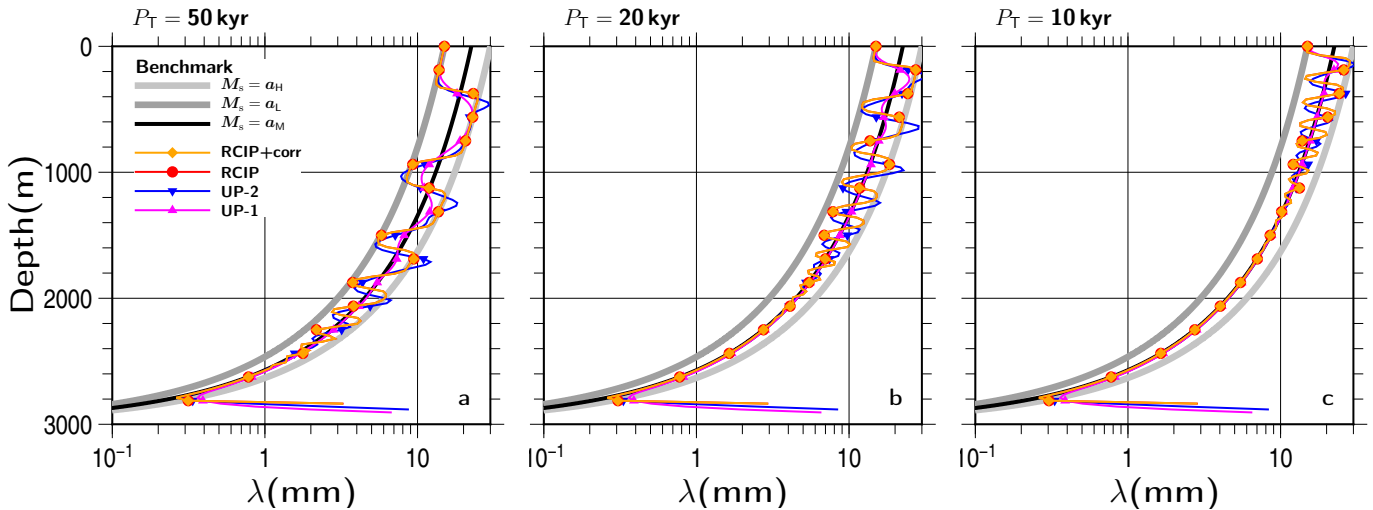

**Figure 17.** Results of transient experiments conducted with the square-wave surface mass balances of  $a_H, a_L = 3, 1.5 \text{ cm yr}^{-1}$  and  $P_H : P_L = 1 : 1$  (Eq. 57), and the total duration as (a)  $P_T = 10 \text{ kyr}$  (b)  $P_T = 20 \text{ kyr}$ , and (c)  $P_T = 50 \text{ kyr}$ . The basal mass balance is set as 0 for all the experiments in the figure. The vertical profiles of the annual layer thickness  $\lambda$  at 1000 kyr using RCIP+corr, RCIP (which overlaps with RCIP+corr), UP-2, and UP-1 are shown. The gray and black lines indicate benchmark solutions of constant surface mass balance cases with  $a_H, a_L$ , and  $a_M = (a_H + a_L)/2$  given as references. Uniform grid-spacing of 129 levels is adopted in this simulation.

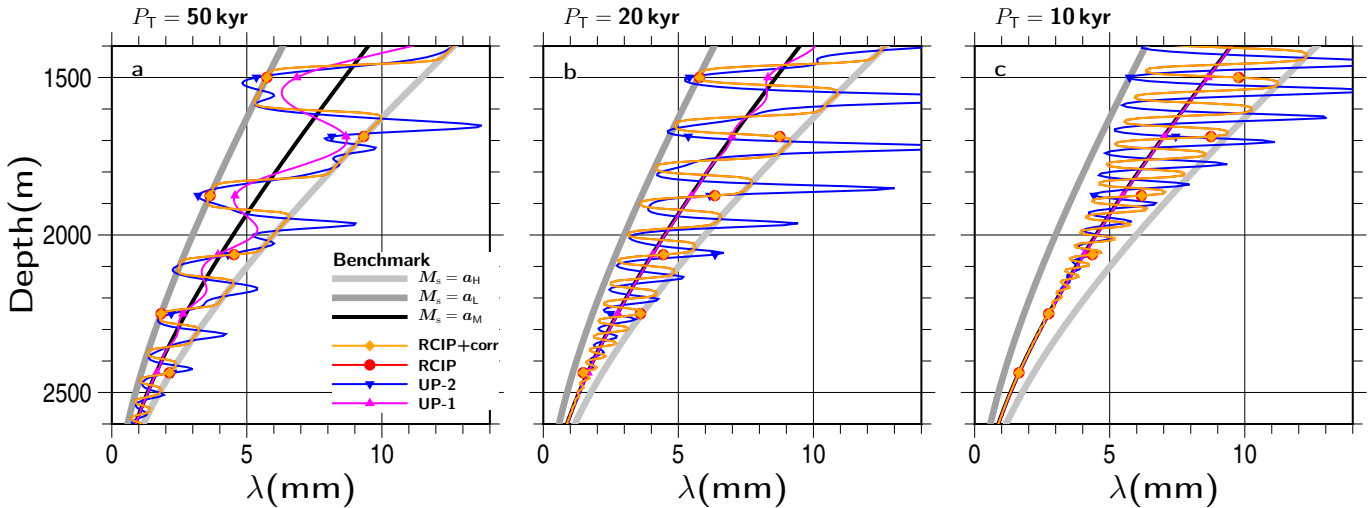

**Figure 18.** Same as Fig. 17, except for the vertical resolution, which is shown as uniform grid-spacing of 513 levels. The results at 2000 kyr covering the depth from 1400 to 2600 m are shown.

430 Here, the same series of experiments is repeated using a higher resolution and a uniform grid-spacing of 513 levels, which is four times the resolution of the previous experiments. The vertical line marked as Z: 519e in Fig. 16b corresponds to this grid-spacing. As the figure shows, this discretization can hold 5, 2, and 1 kyr differences by  $\zeta \sim 0.19, 0.33,$  and  $0.51,$  respectively, corresponding to 2430, 2010, and 1470 m in depth, respectively. The time step for higher resolution experiments hereafter is set as 25 yr.

435 Figure 18 is the same as Fig. 17 except for the vertical grid-spacing adopted and with zooming shown near the bottom part. The patterns seem to be well preserved by around the depths corresponding to the  $\zeta$  above, but the computed ages produced by the RCIP+corr(RCIP) schemes are not on the line  $M_s = a_L$  below the corresponding depths.

### 3.8 Non-uniform discretization

So far, all of the experiments were performed with uniform discretization of either 129 or 513 levels. For most cases in  
 440 the present study, it is reasonable to adopt non-uniform discretization, which means large spacing toward the top and small spacing toward the bottom. Since, in the previous section, it was estimated that at least 1/10 duration of the input cycle is necessary to resolve one grid, the discretization can be optimized according to the  $\Delta\zeta$  profile computed with the minimum surface mass balance of the experiment. Here, for example, the target experiments are set as the square-wave surface mass balance with  $P_T = 100$  kyr,  $P_H : P_L = 1 : 1,$   $M_b = 0,$   $H = 3000$  m constant, and  $a_H, a_L = 3, 1.5$  cm yr $^{-1}$ . This is the same  
 445 configuration seen in Fig. 6. For this configuration, the combination of  $T_{res} = P_T/20 = 5$  kyr and  $M_s = 1.5$  cm yr $^{-1}$  is adopted in order to compute the reference profile in the same way as Fig. 16. This number, which is half the number of the estimates used in the previous section, was chosen for safety, and to facilitate additional experiments with other configurations (e.g.,  $a_L = 0.75$  cm yr $^{-1}$  and/or  $P_T = 50$  kyr, which are archived in the Supplement).





Two non-uniform discretization types are adopted in this section. One is  smooth grid and the other is a smooth grid  
450 (introduced in Sect. 2.2). Various methods can be applied for non-smooth discretization. A very simple method, which is  
adopted in this study, calls for starting an initial spacing from the top and then keeping the same grid spacing as long as it is  
smaller than the reference profile. When the spacing exceeds the reference, it is halved from the coordinates and maintained  
at that size until it exceeds the reference again. It is necessary to limit the minimum grid spacing in order to avoid an infinite  
number of discretizations. The line marked as Z: 477o in Fig. 16 is a computed profile following the method mentioned above,  
455 which runs from  $\Delta\zeta = 2^{-6}$  to  $2^{-11}$ . It contains 477 levels from  $\zeta = 0$  to  $\zeta = 1$ . The vertical coordinate system Z (model logical  
coordinate, see Sect.2.2) is identical to  $\zeta$ , and the series of  $\zeta_k$  is shown in Fig. 16a.

For non-uniform smooth discretization, a transformation function that follows the reference profile is necessary between  $\zeta$   
and Z. After some trial and error, the following formulation was adopted:

$$\zeta \equiv \frac{(Z + 4Z^{14})}{5}, \quad Z_k = \frac{k}{N_k - 1} \text{ for } k = 0, \dots, N_k - 1. \quad (63)$$

460 The linear term,  $Z/5$ , in Eq. (63) is needed to avoid infinite  $\frac{\partial Z}{\partial \zeta}$ , which is used for in Eq. (45). Here, the same number of levels  
(513) is adopted to discretize under the Z-coordinate system. The line marked as Z:513p in Fig. 16 is the profile obtained  
by (63), which maintains spacing smaller than or equal to the reference profile until near the bottom. Figure 16a shows the  
uniform grid-spacing of Z, which corresponds to the non-uniform  $\zeta$  grid-spacing achieved by this method. Additionally, Fig. 16  
marks the two vertical coordinates as references in order to reach 1000 and 2000 kyr, respectively, under the constant condition  
465  $M_s = 1.5 \text{ cm yr}^{-1}$ ,  $M_b = 0$ ,  $H = 3000 \text{ m}$ .

Figures 19 and 20 show the results obtained using the uniform-spacing (Z:513e), smooth-grid (Z:513p), and non-smooth-  
grid (Z:477o) discretization methods, in terms of  $\lambda$  vs depth, and  $\lambda$  vs age. A comparison with Fig. 6 shows that the latter  
preserves the input shape deeper than the former. As shown in Fig. 16, the uniform discretization case (marked as Z:513e)  
is expected to fail to resolve 10 kyr at age 1000 kyr, which is presented in Fig. 20. The results of UP-1 preserved the input  
470 shape deeper than the lower resolution, which are almost only half of those achieved with the RCIP+corr(RCIP) methods.  
The results of UP-2 were preserved at slightly deeper depths than those of UP-1. However, their phases are shown to be  
shifted from those of the RCIP+corr(RCIP) methods, particularly at the deeper part. For differences in the computed age from  
the RCIP method (a and b), quantitatively, the same performance levels as the lower-resolution experiment were obtained by  
the other methods. The UP-1 and UP-2 methods deviate from the RCIP method by around 1 kyr and 10 kyr at most, while  
475 RCIP+corr deviates by around 100 yr. Using non-uniform discretization, preservation of the input shape is further extended to  
the deeper part (Fig. 19). As shown in Fig. 16, the non-smooth non-uniform discretization case (marked as Z:477o) crosses  
the  $T_{\text{res}} = 10 \text{ kyr}$  line at  $\zeta \sim 0.07$  (i.e., 2790 m depth) for the  $a_L = 1.5 \text{ cm yr}^{-1}$  experiment, which is observed in Fig. 20. The  
smooth non-uniform discretization case (marked as Z:513p) crosses the  $T_{\text{res}} = 10 \text{ kyr}$  line slightly below that depth,  $\zeta \sim 0.06$   
(2820 m depth), which is observed in Fig. 20 again. In addition, similar to the lower-resolution experiment, Fig. 20 shows that  
480 the RCIP+corr(RCIP) scheme performs relatively better in terms of the phases than those with the UP-2 and UP-1 schemes.

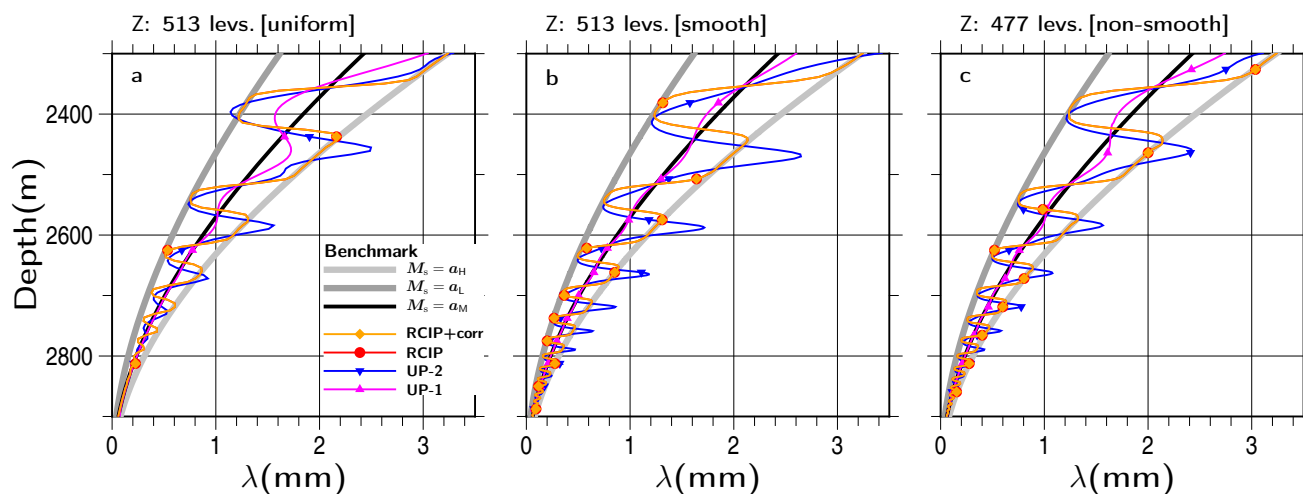

**Figure 19.** Same as Fig. 6c, except for the vertical resolution as (a) uniform grid-spacing of 513 levels, (b) smooth non-uniform grid-spacing of 513 levels, and (c) non-smooth non-uniform grid-spacing of 477 levels. The results at 2000 kyr covering the depths from 2300 to 2900 m are shown.

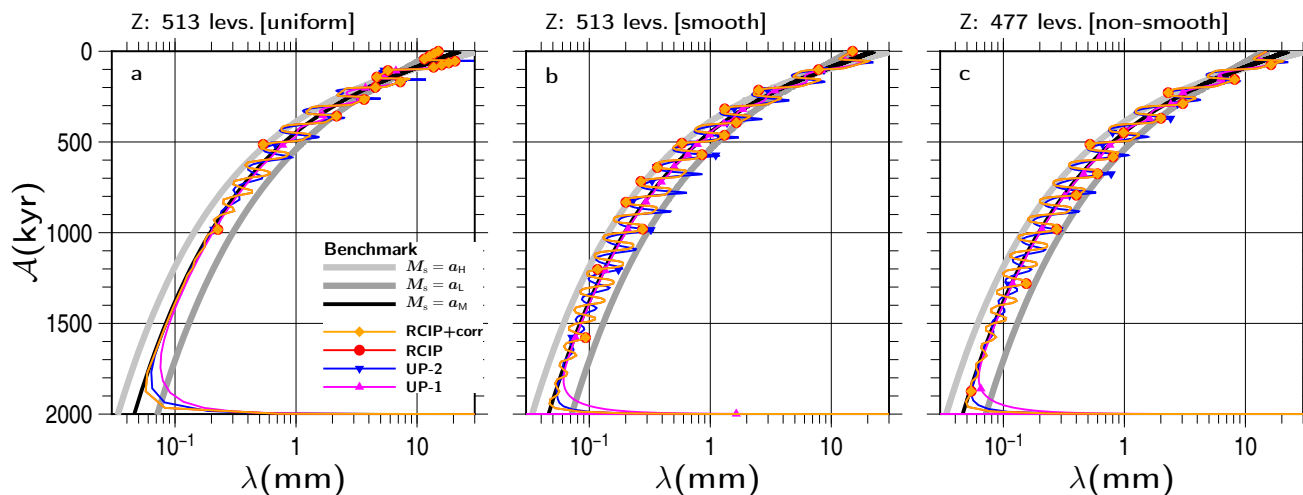

**Figure 20.** Same as Fig. 10, except for the vertical resolution as (a) uniform grid-spacing of 513 levels, (b) smooth non-uniform grid-spacing of 513 levels, and (c) non-smooth non-uniform grid-spacing of 477 levels. The results at 2000 kyr are shown.



#### 4 Discussion and conclusion

The present study demonstrates 1D age computation of ice-sheets under various configurations, such as uniform velocity, constant velocity, variable velocity responding to transient changes in surface mass balance, and/or changes in ice-sheet thickness. Comparisons of the vertical profiles of computed ages, as well as annual layer thicknesses, are examined among the RCIP  
485 schemes (semi-Lagrangian) and upwind schemes (Eulerian).

Overall, the RCIP schemes show the best performance levels among the schemes examined in the present study. In particular, the computed vertical profiles of the annual layer thicknesses produced by RCIP schemes follow the expected depth profiles more reasonably than the other methods. This advantage reflects the design of RCIP scheme, which explicitly computes the evolution of the age derivative, i.e., the inverse of annual layer thickness, using an advection equation that is similar to the one  
490 used to compute the age itself. Using the other schemes, the computed vertical profiles of annual layer thickness either show more smoothing at shallower depths than that were found with the RCIP scheme, or the development of oscillation at steep changes in the input surface mass balance. Such oscillation development is shown even when the input is a smooth cosine-wave type pattern and the amplitude is large. Since the slope filter adopted in this study is extremely simple, it is possible that the results obtained by the use of a second-order upwind scheme with a more suitable filter will change the characteristics.  
495 Introduction of slope limiters on general non-uniform discretization for higher-order upwind schemes is possible (Murman et al., 2005), but the conditions used for switching between a cubic polynomial and a rational form (Eqs. 11 and 12) in the RCIP scheme may be simpler and easier to implement. Under some configurations, oscillation development is not shown by the second-order upwind scheme. However, the phases of annual layer thickness against the age are shifted from those expected from the initial inputs, which again demonstrates the advantages of the RCIP scheme.

500 We examined two methods of computing the departure points in our RCIP scheme experiments. Under a constant velocity case, the results by the simpler method show even less accurate solutions than the first-order upwind scheme, while the other 'correction' method shows the best performance. The computed age differences between the two RCIP methods is 1000yr at most for all the configurations examined in the present study, including the vertical resolution. As a result, the simpler method still performs well if the expected accuracy of the application is less than that period. Under an evolving surface mass balance,  
505 the solution of the upwind schemes deviation is by 10kyr, which is slightly larger.

Although the focus of the present study is limited to 1D age computations, implementation of the RCIP scheme for 3D computation of the age field is also a suitable subject for future discussions. In addition, the evolutions of ice-sheet thickness and temperature are formulated using the transport or advection equations, which are also good candidates for extending the discussion of this study. For such cases, researchers may be interested in mass or energy conservation in the field. Actually, a  
510 multi-dimensional conservative formulation of CIP schemes has already been proposed (Yabe et al., 2002). The implementation of the scheme to 3D age and temperature fields in numerical ice-sheet models has already been set as the next target of our development.



*Code availability.* The exact version of the model is copyrighted by Japan Agency for Marine-Earth Science and Technology (JAMSTEC), which is currently not publicly available. Access to the full code including the scripts used to run the model for all the simulations presented  
515 in this paper can be granted on demand by a request to the corresponding author.

## Appendix A: Notes on time-splitting

A time splitting technique (Eqs. 2 and 3) is a core of the CIP schemes, which is somewhat difficult to understand at a first glance. A simple explanation is tried as follows. If it is assumed that the non-advection term  $h(x, t)$  satisfies at least locally  $h(x, t) = h^*(t)$ , i.e., not dependent on  $x$ , a new variable  $f^*(x, t)$  can be introduced such that

$$520 \quad f^*(x, t) = f(x, t) - \int dt h(x, t) \simeq f(x, t) - \int dt h^*(t). \quad (\text{A1})$$

Introducing Eq. (A1) into the original advection equation (1), a pure advection form of  $f^*$  can be obtained,

$$\frac{\partial f^*}{\partial t} + u(x, t) \frac{\partial f^*}{\partial x} = 0, \quad (\text{A2})$$

which is the same form to the advection phase equation (2). Using a semi-Lagrangian algorithm, solving Eq. (A2) for  $f^*$  at time  $t + \Delta t$  requires  $f^*(x, t)$ , which is identical to  $f(x, t)$  by cancellation of the integral term of Eq. (A1). Therefore, Eq. (A2)  
525 is solved by the identical procedure of Eq. (2). After solving  $f^*(t + \Delta t)$ ,  $f(t + \Delta t)$  can be computed using Eq. (A1), such that

$$f(x, t + \Delta t) = f^*(x, t + \Delta t) + \int_t^{t+\Delta t} dt h^*(t), \quad (\text{A3})$$

which is the same as the non-advection equation (3) and the solution (21) where  $f(x)$  is integrated with the initial condition  $f_j^*$ .

## Appendix B: Implementation of RCIP method in the present paper

530 ‘Machine epsilon’ is defined as the smallest  $\epsilon$  in a computer such that  $1 + \epsilon > 1$  under floating-point arithmetic. Similarly, an arbitrarily number  $f$  has the corresponding smallest number (hereafter  $\epsilon_f$ ) which satisfies  $f + \epsilon_f > f$ . In very rare cases, the authors observed the age at the upwind grid point becomes close to the value at the target grid point, which differs by  $\epsilon_f$  (i.e.,  $f_{j+1} = f_j + \epsilon_f$ ). Since no representative value exists between  $f_{j+1}$  and  $f_j$  under floating-point arithmetic, the upwind value is either  $f_j$  or  $f_{j+1}$ . Sometimes,  $f_{j+1}$  corresponds to a value at a grid point too far away to be transported. If there is an  
535 accumulation of errors of this type, the computed age may show unexpected oscillations.

Although rounding up very small differences may be a possible solution for such cases, a different approach was adopted in the present study. After some trials, finally the authors adopted the following procedure for avoiding such oscillation, which (to the degree they used it) worked better than the rounding-up procedure. In the numerical model of the present paper, Eq. (14) is transformed as follows:

$$540 \quad F_j(X) = f_j + \frac{g_j X + C_2 X^2 + C_3 X^3}{1 + \alpha D_1 X} = f_j + \delta f, \quad (\text{B1})$$



where  $C_1$  and  $C_0$  are substituted using Eqs. (18) and (19). The second term  $\delta f$  can be computed as the difference between  $f_j$  and  $f_{j+1}$ . When  $\delta f$  is non-zero but sufficiently small, i.e., less than  $\varepsilon_f$ , the value  $f_j + \delta f$  is maintained as  $f_j$ . After simple reformulation,  $F_j(X)$  in the model code is finally formulated as

$$F_j(X) = f_j + \frac{\hat{C}_1 X + \hat{C}_2 X^2 + \hat{C}_3 X^3}{\hat{D}_0 + \alpha \hat{D}_1 X}, \quad (\text{B2})$$

545 where new series of constants are

$$\hat{D}_0 = |g_{j+1} - S_j|, \quad (\text{B3})$$

$$\hat{D}_1 = D_1 |g_{j+1} - S_j| = \frac{|S_j - g_j| - |g_{j+1} - S_j|}{\Delta x_{j+\frac{1}{2}}}, \quad (\text{B4})$$

$$\hat{C}_1 = g_j |g_{j+1} - S_j|, \quad (\text{B5})$$

$$\hat{C}_2 = C_2 |g_{j+1} - S_j| = S_j \alpha \hat{D}_1 + \frac{(S_j - g_j) |g_{j+1} - S_j|}{\Delta x_{j+\frac{1}{2}}} - \hat{C}_3, \quad (\text{B6})$$

$$550 \quad \hat{C}_3 = C_3 |g_{j+1} - S_j| = \frac{|g_{j+1} - S_j|}{\Delta x_{j+\frac{1}{2}}} \left[ g_j - S_j + (g_{j+1} - S_j) + \alpha \hat{D}_1 \Delta x_{j+\frac{1}{2}} \right], \quad (\text{B7})$$

$$(\text{B8})$$

respectively. When  $g_{j+1} - S_j = 0$  (and  $\alpha = 1$ ), the coefficients lead to

$$\hat{C}_3 = 0, \quad \hat{C}_1 = 0, \quad \hat{D}_0 = 0, \quad (\text{B9})$$

$$\hat{C}_2 = S_j \frac{|S_j - g_j|}{\Delta x_{j+\frac{1}{2}}}, \quad (\text{B10})$$

$$555 \quad \hat{D}_1 = \frac{|S_j - g_j|}{\Delta x_{j+\frac{1}{2}}}, \quad (\text{B11})$$

$$(\text{B12})$$

respectively, and using this combination,  $F_j(X)$  is formulated as

$$F_j(X) = f_j + \frac{\hat{C}_2 X^2}{\hat{D}_1 X} = f_j + S_j X, \quad (\text{B13})$$

which means a linear profile is adopted, regardless of  $g_j$ .

560 *Author contributions.* FS developed the ice-sheet model and then implemented the RCIP and other dating schemes into the model. FS performed numerical experiments designed by all the authors. The manuscript was written by FS with contributions from TO and AAO.

*Competing interests.* The authors declare that they have no conflicts of interest.

<https://doi.org/10.5194/gmd-2020-53>  
Preprint. Discussion started: 4 March 2020  
© Author(s) 2020. CC BY 4.0 License.

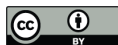

*Acknowledgements.* This study was supported by the Japan Society for the Promotion of Science (JSPS) KAKENHI under Grant Numbers 17K05664, 17H06323, 17H06104.



## 565 References

- Clarke, G. K. C., Lhomme, N., and Marshall, S. J.: Tracer transport in the Greenland ice sheet: three-dimensional isotopic stratigraphy, *Quaternary Science Reviews*, 24, 155–171, <https://doi.org/10.1016/j.quascirev.2004.08.021>, <http://www.sciencedirect.com/science/article/B6VBC-4DS92J4-1/2/611027ceb4e1f74bb87ab3c501239d68>, 2005.
- Cuffey, K. M. and Paterson, W. S. B.: *The Physics of Glaciers*, Academic Press, fourth edn., 2010.
- 570 Fischer, H., Severinghaus, J., Brook, E., Wolff, E., Albert, M., Alemany, O., Arthern, R., Bentley, C., Blankenship, D., Chappellaz, J., Creyts, T., Dahl-Jensen, D., Dinn, M., Frezzotti, M., Fujita, S., Gallee, H., Hindmarsh, R., Hudspeth, D., Jugie, G., Kawamura, K., Lipenkov, V., Miller, H., Mulvaney, R., Parrenin, F., Pattyn, F., Ritz, C., Schwander, J., Steinhage, D., van Ommen, T., and Wilhelms, F.: Where to find 1.5 million yr old ice for the IPICS “Oldest-Ice” ice core, *Climate of the Past*, 9, 2489–2505, <https://doi.org/10.5194/cp-9-2489-2013>, <http://www.clim-past.net/9/2489/2013/>, 2013.
- 575 Greve, R. and Hutter, K.: Polythermal three-dimensional modelling of the Greenland ice sheet with varied geothermal heat flux, *Annals of Glaciology*, 21, 8–12, 1995.
- Greve, R., Wang, Y., and Mège, B.: Comparison of numerical schemes for the solution of the advective age equation in ice sheets, *Annals of Glaciology*, 35, 487–494, <https://doi.org/10.3189/172756402781817112>, 2002.
- Lhomme, N., Clarke, G. K. C., and Marshall, S. J.: Tracer transport in the Greenland Ice Sheet: constraints on ice cores and glacial history, *Quaternary Science Reviews*, 24, 173–194, <https://doi.org/10.1016/j.quascirev.2004.08.020>, <http://www.sciencedirect.com/science/article/B6VBC-4DW2PC8-2/2/bff5252dbfb42af719bb6eccc59bf05>, 2005.
- Mège, B., Savvin, A., Calov, R., and Greve, R.: Numerical Age Computation of the Antarctic Ice Sheet for Dating Deep Ice Cores, in: *Advances in Cold-Region Thermal Engineering and Sciences*, edited by Hutter, Y. W. K. and Beer, H., pp. 307–318, Springer, 1999.
- Murman, S., Berger, M., and Aftosmis, M.: Analysis of slope limiters on irregular grids, in: *Technical Report NAS-05-007*, NAS, 2005.
- 585 Parrenin, F., Dreyfus, G., Durand, G., Fujita, S., Gagliardini, O., Gillet, F., Jouzel, J., Kawamura, K., Lhomme, N., Masson-Delmotte, V., Ritz, C., Schwander, J., Shoji, H., Uemura, R., Watanabe, O., and Yoshida, N.: 1-D-ice flow modelling at EPICA Dome C and Dome Fuji, East Antarctica, *Climate of the Past*, 3, 243–259, 2007.
- Rybak, O. and Huybrechts, P.: A comparison of Eulerian and Lagrangian methods for dating in numerical ice-sheet models, *Annals of Glaciology*, 37, 150–158, <https://doi.org/10.3189/172756403781815393>, 2003.
- 590 Shashkov, M.: *Conservative Finite-Difference Methods on General Grids*, CRC press, Boca Raton, 1st edn., <https://doi.org/10.1201/9781315140209>, <https://doi.org/10.1201/9781315140209>, 1995.
- Tarasov, L. and Peltier, W. R.: Greenland glacial history, borehole constraints, and Eemian extent, *Journal of Geophysical Research*, 108, 2143, <https://doi.org/10.1029/2001JB001731>, <http://dx.doi.org/10.1029/2001JB001731>, 2003.
- Toda, K., Ogata, Y., and Yabe, T.: Multi-dimensional conservative semi-Lagrangian method of characteristics {CIP} for the shallow water equations, *Journal of Computational Physics*, 228, 4917–4944, <https://doi.org/http://dx.doi.org/10.1016/j.jcp.2009.04.003>, <http://www.sciencedirect.com/science/article/pii/S0021999109001910>, 2009.
- Xiao, F., Yabe, T., and Ito, T.: Constructing oscillation preventing scheme for advection equation by rational function, *Comp. Phys. Comm.*, 93, 1–12, [https://doi.org/10.1016/0010-4655\(95\)00124-7](https://doi.org/10.1016/0010-4655(95)00124-7), <http://www.sciencedirect.com/science/article/pii/0010465595001247>, 1996.
- Yabe, T. and Takei, E.: A New Higher-Order Godunov Method for General Hyperbolic Equations, *Journal of the Physical Society of Japan*, 57, 2598–2601, <https://doi.org/10.1143/JPSJ.57.2598>, <https://doi.org/10.1143/JPSJ.57.2598>, 1988.
- 600



Yabe, T., Xiao, F., and Utsumi, T.: The Constrained Interpolation Profile Method for Multiphase Analysis, *Journal of Computational Physics*, 169, 556–593, <https://doi.org/https://doi.org/10.1006/jcph.2000.6625>, <http://www.sciencedirect.com/science/article/pii/S0021999100966257>, 2001.

605 Yabe, T., Ogata, Y., Takizawa, K., Kawai, T., Segawa, A., and Sakurai, K.: The next generation CIP as a conservative semi-Lagrangian solver for solid, liquid and gas, *Journal of Computational and Applied Mathematics*, 149, 267–277, [https://doi.org/http://dx.doi.org/10.1016/S0377-0427\(02\)00535-6](https://doi.org/http://dx.doi.org/10.1016/S0377-0427(02)00535-6), <http://www.sciencedirect.com/science/article/pii/S0377042702005356>, scientific and Engineering Computations for the 21st Century - Methodologies and Applications Proceedings of the 15th Toyota Conference, 2002.
